# Supplementary material for: Critical care service delivery across healthcare systems in low-income and low-middle-income countries: protocol for a systematic review
Source: PubMed Central journal article supplement — BMJ Open. 2021 Aug 30;11(8):e048423. doi: 10.1136/bmjopen-2020-048423 (PMC8407204; doi:10.1136/bmjopen-2020-048423), 2021-08-30
Supplement: bmjopen-2020-048423.draft_revisions.pdf [file bmjopen-2020-048423.draft_revisions.pdf]

# BMJ Open

BMJ Open is committed to open peer review. As part of this commitment we make the peer review history of every article we publish publicly available.

When an article is published we post the peer reviewers' comments and the authors' responses online. We also post the versions of the paper that were used during peer review. These are the versions that the peer review comments apply to.

The versions of the paper that follow are the versions that were submitted during the peer review process. They are not the versions of record or the final published versions. They should not be cited or distributed as the published version of this manuscript.

BMJ Open is an open access journal and the full, final, typeset and author-corrected version of record of the manuscript is available on our site with no access controls, subscription charges or pay-per-view fees (<http://bmjopen.bmj.com>).

If you have any questions on BMJ Open's open peer review process please email [info.bmjopen@bmj.com](mailto:info.bmjopen@bmj.com)

# BMJ Open

## Critical care service delivery across healthcare systems in low- and low-middle income countries: Protocol for a Systematic Review

|                               |                                                                                                                                                                                                                                                                                                                                                                                                                                                                                                                                                                                                                                                                                                                                                                                                                                                                                                                                                                                                                                                                                                                                                                                                                                                                                                                                                                                                                                                                                                                                                                                                                                                                                                                                                                                                                                                                                                                                                                                                                                                                             |
|-------------------------------|-----------------------------------------------------------------------------------------------------------------------------------------------------------------------------------------------------------------------------------------------------------------------------------------------------------------------------------------------------------------------------------------------------------------------------------------------------------------------------------------------------------------------------------------------------------------------------------------------------------------------------------------------------------------------------------------------------------------------------------------------------------------------------------------------------------------------------------------------------------------------------------------------------------------------------------------------------------------------------------------------------------------------------------------------------------------------------------------------------------------------------------------------------------------------------------------------------------------------------------------------------------------------------------------------------------------------------------------------------------------------------------------------------------------------------------------------------------------------------------------------------------------------------------------------------------------------------------------------------------------------------------------------------------------------------------------------------------------------------------------------------------------------------------------------------------------------------------------------------------------------------------------------------------------------------------------------------------------------------------------------------------------------------------------------------------------------------|
| Journal:                      | <i>BMJ Open</i>                                                                                                                                                                                                                                                                                                                                                                                                                                                                                                                                                                                                                                                                                                                                                                                                                                                                                                                                                                                                                                                                                                                                                                                                                                                                                                                                                                                                                                                                                                                                                                                                                                                                                                                                                                                                                                                                                                                                                                                                                                                             |
| Manuscript ID                 | bmjopen-2020-048423                                                                                                                                                                                                                                                                                                                                                                                                                                                                                                                                                                                                                                                                                                                                                                                                                                                                                                                                                                                                                                                                                                                                                                                                                                                                                                                                                                                                                                                                                                                                                                                                                                                                                                                                                                                                                                                                                                                                                                                                                                                         |
| Article Type:                 | Protocol                                                                                                                                                                                                                                                                                                                                                                                                                                                                                                                                                                                                                                                                                                                                                                                                                                                                                                                                                                                                                                                                                                                                                                                                                                                                                                                                                                                                                                                                                                                                                                                                                                                                                                                                                                                                                                                                                                                                                                                                                                                                    |
| Date Submitted by the Author: | 30-Dec-2020                                                                                                                                                                                                                                                                                                                                                                                                                                                                                                                                                                                                                                                                                                                                                                                                                                                                                                                                                                                                                                                                                                                                                                                                                                                                                                                                                                                                                                                                                                                                                                                                                                                                                                                                                                                                                                                                                                                                                                                                                                                                 |
| Complete List of Authors:     | <p>Lim, Andrew; Virginia Mason Medical Center, Section of Critical Care Medicine; Stanford University, Division of Critical Care Medicine</p> <p>Adhikari, Neill; Sunnybrook Health Sciences Centre and University of Toronto, Division of Critical Care Medicine</p> <p>Kivlehan, Sean; Brigham and Women's Hospital, Department of Emergency Medicine; Harvard University</p> <p>Losonczy, Lia; The George Washington University Medical Center, Department of Emergency Medicine, Department of Anaesthesia &amp; Critical Care Medicine</p> <p>Murthy, Srinivas; University of British Columbia, Department of Paediatrics</p> <p>Dippenaar, Enrico; Anglia Ruskin University, Emergency Medicine Research Group</p> <p>Lowsby, Richard; Mid Cheshire Hospitals NHS Foundation Trust, Department of Critical Care Medicine, Department of Emergency Medicine</p> <p>Yang, Marc Li Chuan; The Chinese University of Hong Kong Faculty of Medicine, Accident and Emergency Medicine</p> <p>Jaung, Michael ; Baylor College of Medicine, Department of Emergency Medicine</p> <p>Stephens, P. Andrew ; Cleveland Clinic Foundation, Department of Emergency Medicine, Intensive Care &amp; Resuscitation</p> <p>Benzoni, Nicole; Washington University School of Medicine in Saint Louis, Division of Pulmonary &amp; Critical Care Medicine</p> <p>Sefa, Nana; University of Michigan Medical School, Department of Emergency Medicine</p> <p>Bartlett, Emily; University of Washington, Department of Emergency Medicine</p> <p>Chaffay, Brandon; The George Washington University Hospital, Department of Emergency Medicine</p> <p>Haridasa, Naeha; The George Washington University School of Medicine and Health Sciences</p> <p>Velasco, Bernadett ; East Avenue Medical Center, Department of Emergency Medicine</p> <p>Yi, Sojung ; University of California San Francisco, Department of Emergency Medicine</p> <p>Contag, Caitlin; Stanford University, Department of Medicine</p> <p>Rashed, Amir; Jacobi Medical Center, Department of Emergency Medicine</p> |

|           |                                                                                                                                                                                                                                                                                                                                                                                                                                                                                                                                                                                                                                                                                                                                                                                                                                   |
|-----------|-----------------------------------------------------------------------------------------------------------------------------------------------------------------------------------------------------------------------------------------------------------------------------------------------------------------------------------------------------------------------------------------------------------------------------------------------------------------------------------------------------------------------------------------------------------------------------------------------------------------------------------------------------------------------------------------------------------------------------------------------------------------------------------------------------------------------------------|
|           | <p>McCarville, Patrick; The George Washington University Hospital, Department of Emergency Medicine<br/>         Sonenthal, Paul; Brigham and Women's Hospital, Division of Pulmonary &amp; Critical Care Medicine; Harvard Medical School<br/>         Shukur, Nebiyu ; The George Washington University Hospital, Department of Emergency Medicine<br/>         Bellou, Abdelouahab; Harvard Medical School, Department of Emergency Medicine<br/>         Mickman, Carl; Mount Sinai Hospital, Department of Emergency Medicine<br/>         Ghatak-Roy, Adhiti; The George Washington University School of Medicine and Health Sciences, Emergency Medicine<br/>         Ferreira, Allison; University of California Los Angeles, Department of Emergency Medicine<br/>         Reynolds, Teri; World Health Organization</p> |
| Keywords: | <p>ACCIDENT &amp; EMERGENCY MEDICINE, Adult intensive &amp; critical care &lt; ANAESTHETICS, Paediatric intensive &amp; critical care &lt; ANAESTHETICS, Organisation of health services &lt; HEALTH SERVICES ADMINISTRATION &amp; MANAGEMENT, International health services &lt; HEALTH SERVICES ADMINISTRATION &amp; MANAGEMENT, Neonatal intensive &amp; critical care &lt; INTENSIVE &amp; CRITICAL CARE</p>                                                                                                                                                                                                                                                                                                                                                                                                                  |
|           |                                                                                                                                                                                                                                                                                                                                                                                                                                                                                                                                                                                                                                                                                                                                                                                                                                   |

SCHOLARONE™  
 Manuscripts

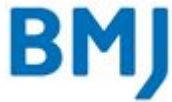

I, the Submitting Author has the right to grant and does grant on behalf of all authors of the Work (as defined in the below author licence), an exclusive licence and/or a non-exclusive licence for contributions from authors who are: i) UK Crown employees; ii) where BMJ has agreed a CC-BY licence shall apply, and/or iii) in accordance with the terms applicable for US Federal Government officers or employees acting as part of their official duties; on a worldwide, perpetual, irrevocable, royalty-free basis to BMJ Publishing Group Ltd ("BMJ") its licensees and where the relevant Journal is co-owned by BMJ to the co-owners of the Journal, to publish the Work in this journal and any other BMJ products and to exploit all rights, as set out in our [licence](#).

The Submitting Author accepts and understands that any supply made under these terms is made by BMJ to the Submitting Author unless you are acting as an employee on behalf of your employer or a postgraduate student of an affiliated institution which is paying any applicable article publishing charge ("APC") for Open Access articles. Where the Submitting Author wishes to make the Work available on an Open Access basis (and intends to pay the relevant APC), the terms of reuse of such Open Access shall be governed by a Creative Commons licence – details of these licences and which [Creative Commons](#) licence will apply to this Work are set out in our licence referred to above.

Other than as permitted in any relevant BMJ Author's Self Archiving Policies, I confirm this Work has not been accepted for publication elsewhere, is not being considered for publication elsewhere and does not duplicate material already published. I confirm all authors consent to publication of this Work and authorise the granting of this licence.

**Title:** Critical care service delivery across healthcare systems in low- and low-middle income countries: Protocol for a Systematic Review

In accordance with the guidelines, our systematic review protocol was registered with the International Prospective Register of Systematic Reviews (PROSPERO) on 29 October, 2019 and was last updated on 21 April, 2020 (registration number CRD42019146802). In the event of protocol amendments, the date of each amendment will be accompanied by a description of the change and the rationale.

**Authors:**

Andrew G Lim (Virginia Mason Medical Center, Section of Critical Care Medicine Seattle, WA, USA; Stanford University, Division of Critical Care Medicine, Stanford, CA, USA)  
Neill KJ Adhikari (Sunnybrook Health Sciences Centre and University of Toronto, Division of Critical Care Medicine, Toronto, CAN)  
Sean M Kivlehan (Brigham and Women's Hospital, Department of Emergency Medicine, Boston, MA, USA; Harvard University, Cambridge, MA, USA)  
Lia Losonczy (The George Washington University Medical Center, Department of Emergency Medicine, Department of Anaesthesia & Critical Care Medicine, Washington, DC, USA)  
Srinivas Murthy (University of British Columbia, Department of Paediatrics, Vancouver, BC, CAN)  
Enrico Dippenaar (Anglia Ruskin University, Emergency Medicine Research Group, Chelmsford, Essex, UK)  
Richard Lowsby (Mid Cheshire Hospitals NHS Foundation Trust, Department of Critical Care Medicine, Department of Emergency Medicine, Cheshire, Cheshire, UK)  
Marc Yang (The Chinese University of Hong Kong Faculty of Medicine, Accident and Emergency Medicine, Hong Kong, HK)  
Michael Jaung (Baylor College of Medicine, Department of Emergency Medicine, Houston, TX, USA)  
P. Andrew Stephens (Cleveland Clinic Foundation, Department of Emergency Medicine, Intensive Care & Resuscitation, Cleveland, OH, USA)  
Nicole Benzoni (Washington University School of Medicine in Saint Louis, Division of Pulmonary & Critical Care Medicine, Saint Louis, MO, USA)  
Nana Sefa (University of Michigan Medical School, Department of Emergency Medicine, Ann Arbor, MI, USA)  
Emily Bartlett (University of Washington, Department of Emergency Medicine, Seattle, WA, USA)  
Brandon Chaffay (The George Washington University Hospital, Department of Emergency Medicine, Washington, DC, USA)  
Naeha Haridasa (The George Washington University School of Medicine and Health Sciences, Washington, DC, USA)  
Bernadett Velasco (East Avenue Medical Center, Department of Emergency Medicine, Quezon City, National Capital Region, PH)  
Sojung Yi (University of California San Francisco, Department of Emergency Medicine, San Francisco, CA, USA)  
Caitlin Contag (Stanford University, Department of Medicine, Palo Alto, CA, USA)  
Amir Rashed (Jacobi Medical Center, Department of Emergency Medicine, Bronx, NY, USA)

1  
2  
3 Patrick McCarville (The George Washington University Hospital, Department of Emergency  
4 Medicine, Washington, DC, USA)

5 Paul D Sonenthal (Brigham and Women's Hospital, Division of Pulmonary & Critical Care  
6 Medicine, Boston, MA, USA; Harvard Medical School, Boston, MA, USA)

7 Nebiyu Shukur (The George Washington University Hospital, Department of Emergency  
8 Medicine, Washington, DC, USA)

9 Abdellouahab Bellou (Harvard Medical School, Department of Emergency Medicine, Boston,  
10 MA, USA)

11 Carl Mickman (Mount Sinai Hospital, Department of Emergency Medicine, New York, NY,  
12 USA)

13 Adhiti Ghatak-Roy (The George Washington University School of Medicine and Health  
14 Sciences, Emergency Medicine, Washington, DC, USA)

15 Allison Ferreira (University of California Los Angeles, Department of Emergency Medicine, Los  
16 Angeles, CA, USA)

17 Teri Reynolds (World Health Organization, Geneva, GE, CH)

18  
19 International Federation for Emergency Medicine – Critical Care Review Consortium (IFEM-  
20 CCRC)

21  
22 Corresponding author:

23 Andrew G Lim, [andrewglim@gmail.com](mailto:andrewglim@gmail.com)

24  
25 Acknowledgments:

26 We would like to thank Christopher Donald Stave (Stanford University Library Services) and  
27 Tomas Allen (WHO Library) for their assistance in developing the literature search strategy and  
28 Elsa Courdier (WHO) for manuscript preparation.

29  
30 Other technical support was provided by the International Federation for Emergency Medicine  
31 (IFEM), and the IFEM Special Interest Group for Critical Care in Emergency Medicine.

## Abstract

**Introduction:** Critical care in low- and low-middle income countries (LLMICs) is an underdeveloped component of the healthcare system. Given the increasing growth in demand for critical care services in LLMICs, understanding the current capacity to provide critical care is imperative to inform policy on service expansion. Thus, our aim is to describe the provision of critical care in LLMICs with respect to patients, providers, location of care, and services and interventions delivered.

**Methods & Analysis:** We will search PubMed/MEDLINE, Web of Science, and EMBASE for full-text original research articles available in English describing critical care services that specify the location of service delivery and describe patients and interventions. We will restrict our review to populations from LLMICs (using 2016 World Bank classifications) and published from January 1, 2008 to January 1, 2020. Two-reviewer agreement will be required for both title/abstract and full text review stages, and rate of agreement will be calculated for each stage. We will extract data regarding the location of critical care service delivery, the training of the healthcare professionals providing services, and the illnesses treated according to classification by the World Health Organization (WHO) Universal Health Coverage (UHC) Compendium.

**Ethics & Dissemination:** Reviewed and exempted by the Stanford University Office for Human Subjects Research and IRB on May 20, 2020. The results of this review will be disseminated through scholarly publication and presentation at regional and international conferences. This review is designed to inform broader WHO, IFEM and partner efforts to strengthen critical care globally.

1  
2  
3 **Registration:** Registered with the International Prospective Register of Systematic Reviews  
4  
5 (PROSPERO) on 29 October, 2019 and last updated on 21 April, 2020 (registration number  
6  
7 CRD42019146802).  
8  
9  
10  
11  
12  
13  
14  
15  
16  
17  
18  
19  
20  
21  
22  
23  
24  
25  
26  
27  
28  
29  
30  
31  
32  
33  
34  
35  
36  
37  
38  
39  
40  
41  
42  
43  
44  
45  
46  
47  
48  
49  
50  
51  
52  
53  
54  
55  
56  
57  
58  
59  
60

For peer review only



### Article Summary: (Strengths and Limitations of this Study)

- To our knowledge, this will be the first systematic review of published literature describing critical care services in healthcare settings across all low and lower-middle income countries (LLMICs).
- The scope of the review question is large, which will help to inform public policy but does not allow for meta-analysis to answer a focused clinical question.
- We used standard methods (comprehensive search, training exercises for reviewers, iterative process for conflict resolution) to maximize the rigour of this review.
- A multidisciplinary and multinational team identified through the World Health Organization (WHO) and International Federation for Emergency Medicine (IFEM) networks will conduct this review.

## Introduction

Acute illness can occur at any point in the healthcare system, and requires recognition, resuscitation and stabilization, along with definitive care. The WHO Emergency Care Systems Framework (ECSF) characterizes acute illness as disease or injury processes in which delays can “...worsen prognosis or render care less effective”. [1] This broad scope requires multiple healthcare partners in an integrated system to triage acuity, transport patients, and manage acute illness with infrastructure and personnel. Patients with acute illness often receive critical care, which includes interventions to support failing organ systems and prevent further deterioration while the underlying disease is treated. [2] Critical care interventions vary in technical complexity and location of delivery. Although mechanical ventilation in an intensive care unit (ICU) is a classic example, supplemental oxygen, intravenous fluids, and close monitoring and assessment by nurses and physicians all contribute to the maintenance of basic physiologic functions. [3, 4]

### *Critical care services in low-resource settings*

Critical illness is thought to have a higher incidence and mortality in low and low-middle income countries (LLMICs) [5-7], as shown recently with Global Burden of Disease data for sepsis [8]. The burden is expected to grow because of increasing urbanization, incidence of non-communicable disease and injury, and population life expectancy. The higher burden of critical illness in LLMICs is not matched by capacity in equipment, infrastructure, and healthcare workforce number and education [9-15] leading to excess mortality [16] that is not well-documented because of poor epidemiologic data and clinical research [17, 18]. Because of the lack of ICU capacity, critically ill patients may be managed in non-traditional environments, including hospital wards, emergency care units, or in pre-hospital settings.

## *Objectives*

The primary objective of our systematic review is to characterize the range of critical care services and interventions delivered across the healthcare system in LLMICs by reviewing reports published from January 1, 2008 to January 1, 2020. We aim to characterize the health service location in which these services or interventions are delivered, the healthcare professionals involved, and the conditions being treated.

## **Methods**

### *Eligibility criteria*

Studies will be eligible for inclusion if they meet the following criteria:

1) Study design: original, peer reviewed research articles (including cross-sectional, case-control, and cohort studies, randomized controlled trials, qualitative methods, and mixed methods studies) and systematic reviews that describe critical care services as defined below. We will exclude case reports and series, study protocols, and studies available only as abstracts (e.g. conference abstracts, poster presentations, etc.). We will only include studies with online full-text availability.

2) Setting: LLMICs, as per the 2016 World Bank classification (Table 1). Within LLMICs, we will include studies that describe the location of delivery of critical care services delivered by health care professionals in any setting. We will exclude studies describing out-of-hospital settings where care is delivered by lay providers, and critical care delivered in operating rooms as part of a surgical procedure (but will include studies on critical care in pre- or post-operative care environments). Our rationale is that critical care delivered as part of surgical anaesthesia is

1  
2  
3 often linked to the need for anaesthesia itself rather than to any critical illness. We will exclude  
4 studies of military health operations by high or high-middle income country armed forces  
5  
6 operating in LLMICs whose treatment populations exclusively consist of military personnel.  
7

8  
9  
10 3) Participants: any age group.

11  
12 4) Interventions: critical care services, including medical interventions, diagnostic modalities  
13 (including radiology, laboratory testing, and microbiology) for the diagnosis or prognostication  
14 of critical illness states, pharmaceutical services, and healthcare systems-based processes  
15 (including advance care planning; coordination of specialist services, critical care triage or care  
16 pathways; crisis, surge, mass casualty, and disaster management (Table 2). This list reflects a  
17 broad perspective of critical care services and is informed by the World Health Organization  
18 (WHO) Emergency and Critical Care Services Framework (ECSF) [19].  
19  
20  
21  
22  
23  
24  
25  
26  
27

28 We will include studies that describe critical care service utilization as a study intervention,  
29 exposure, or outcome, including studies of capacity building or education if they also involve  
30 service delivery for patients. We will exclude simulated interventions.  
31  
32  
33  
34

35 5) Timing: studies published from January 1, 2008 to January 1, 2020. This date range  
36 encompasses the contemporaneous provision of critical care before the onset of the global  
37 COVID-19 pandemic.  
38  
39  
40  
41

42 6) Language: studies available in English language through search filters.  
43  
44  
45  
46

#### 47 *Information sources*

48  
49 Our databases include PubMed/MEDLINE, EMBASE, and Web of Science, supplemented by  
50 scanning of reference lists of relevant systematic reviews and searches of WHO intranet  
51  
52  
53  
54  
55  
56  
57  
58  
59  
60

1  
2  
3 databases. We will not consider grey literature due to the large scope of the review question and  
4  
5 desire to focus on peer reviewed studies.  
6  
7  
8  
9

### 10 *Search strategies*

11  
12 Literature search strategies were developed by the authors in conjunction with a Stanford  
13  
14 University Health Sciences librarian (CDS) with expertise in systematic review searching, with  
15  
16 technical support from WHO Library services (TA). We used controlled vocabulary terms and  
17  
18 text words related to critical care in LLMICs (see Appendix 1 for PubMed/MEDLINE search  
19  
20 strategy, subsequently adapted to EMBASE and Web of Science). We also searched PROSPERO  
21  
22 for ongoing or recently completed systematic reviews. We restricted search results to citations in  
23  
24 English pertaining to humans, published from January 1, 2008 to January 1, 2020.  
25  
26  
27  
28  
29  
30

### 31 *Study records*

32  
33 Literature search results will be uploaded to Covidence (Covidence ©, Melbourne, Australia), a  
34  
35 web-based online platform that facilitates collaboration among reviewers during systematic  
36  
37 review study selection. Full text articles will be uploaded to Covidence during the full-text  
38  
39 review phase.  
40  
41  
42  
43  
44

### 45 *Selection Process*

46  
47 Reviewers will be unblinded to author and institution details of citations. To maximize  
48  
49 consistency in assessing inclusion and exclusion criteria among 21 reviewers, we plan calibration  
50  
51 pilot exercises for title and abstract screening and group discussions using a Google forum  
52  
53 group. This training will emphasize the need for sensitivity in citation selection in the title and  
54  
55  
56  
57  
58  
59  
60

1  
2  
3 abstract phase. Independently and in duplicate, reviewers will screen titles and abstracts for  
4  
5 potentially relevant studies using Covidence. Because of the anticipated very large number of  
6  
7 potentially relevant citations, the agreement of two members of the review team will be required  
8  
9 for citation selection at the title and abstract phase; disagreements will be adjudicated by a third  
10  
11 reviewer.  
12

13  
14 Full-text versions of citations included at the title and abstract screening phase will be retrieved  
15  
16 and reviewed by the same team of reviewers. If full-text is not retrievable by at least two  
17  
18 reviewers, the study will be excluded as unavailable. If retrieved citations are found to be  
19  
20 abstract-only, they will be excluded, but we will search for any subsequent peer-reviewed journal  
21  
22 publications not already captured by our search. The agreement of two reviewers will be required  
23  
24 for inclusion of the full-text study in the systematic review, with conflicts resolved by a third  
25  
26 reviewer experienced with this review process. Reasons for full-text exclusion will be recorded  
27  
28 (Table 3).  
29  
30  
31  
32  
33  
34

### 35 *Data Extraction*

36  
37 Individual reviewers will extract data from selected articles using Excel (Microsoft, Redmond,  
38  
39 Washington, U.S.A.). The data sheet underwent multiple iterations, informed by pilot testing on  
40  
41 selected articles and group discussion. A review group member will review each cluster of data  
42  
43 entry for consistency of data extraction.  
44  
45

46  
47 We will extract data on the study design, LLMIC country or countries involved, article  
48  
49 identifiers, location(s) within the healthcare system that critical care service(s) were delivered,  
50  
51 healthcare provider(s) providing the service(s), the critical care service(s) provided, critical  
52  
53 illnesses addressed, sample size, and the age range of the study population. Given the clinical  
54  
55  
56  
57  
58  
59  
60

1  
2  
3 heterogeneity of patient populations and interventions, we will not extract data on patient  
4  
5 outcomes.  
6

7  
8 Critical care services will be identified using international professional society definitions and  
9  
10 the scope of critical care functions in the WHO ECSF. Services will be subsequently classified  
11  
12 based on the categories in the WHO UHC Compendium [20]. We will use the top level  
13  
14 architecture of the compendium to categorize services broadly into foundations of care,  
15  
16 reproductive and sexual health, nutrition, end-of-life and palliative care issues, violence and  
17  
18 injury, non-communicable diseases (including diseases of the cardiovascular, respiratory,  
19  
20 neurologic, endocrine/metabolic, immunologic, digestive, hematologic, genitourinary, and other  
21  
22 systems) and communicable diseases.  
23  
24  
25  
26  
27

### 28 *Risk of Bias*

29  
30 A potential overall source of bias in this review is the large number of reviewers involved in  
31  
32 article selection, such that the threshold for inclusion of studies in the review may vary by  
33  
34 reviewer pair and may lead to underestimate of the locations or types of critical care services  
35  
36 delivered . We have attempted to mitigate this by extensive training of reviewers. Given the  
37  
38 broad scope of the review, anticipated heterogeneous studies (regarding design, population,  
39  
40 methods, and outcomes), and lack of planned meta-analyses to calculate summary effects, we  
41  
42 will not assess the risk of bias of individual studies.  
43  
44  
45  
46  
47  
48

### 49 *Data analysis*

50  
51 We will calculate summary descriptive statistics, using counts and proportions for categorical  
52  
53 data and means (SD) or median (Q1, Q3) for continuous data. We will describe the number of  
54  
55  
56  
57  
58  
59  
60

1  
2  
3 publications by year, types of services delivered, health care provider type, location of service  
4 delivery, study population age-group, and critical illness category (based on the WHO UHC  
5 Compendium), stratified by World Bank income class and WHO region. Due to the descriptive  
6 nature of the study question and expected heterogeneity of patients and interventions, no meta-  
7 analyses of effects on patient outcomes are planned.  
8  
9

10  
11  
12 Subsequent ancillary reviews based on this dataset of studies may investigate specific age-group  
13 populations, continents/regions, World Bank classes, critical care intervention clusters, disease  
14 groups, locations, or healthcare professionals involved.  
15  
16  
17  
18  
19  
20  
21  
22  
23

### 24 *Ethics*

25  
26 The study protocol was reviewed and exempted by the Stanford University Office for Human  
27 Subjects Research and IRB on May 20, 2020.  
28  
29  
30

### 31 *Patient and Public Involvement*

32  
33 No patients involved.  
34  
35  
36  
37  
38

### 39 **Conclusion**

40  
41 We anticipate that the results of this comprehensive review will describe the current scope of  
42 critical care services, providers, and location of service delivery in LLMICs, and will provide a  
43 database of pertinent literature for future studies. The results of the review will be instrumental  
44 for planners and policy makers in developing critical care service infrastructure, funding  
45 priorities, and capacity-building interventions, and will highlight gaps in current knowledge of  
46 critical care service delivery in LLMICs.  
47  
48  
49  
50  
51  
52  
53  
54  
55  
56  
57  
58  
59  
60



1  
2  
3 Tables  
4  
5

6 **Table 1: List of World Bank Low to Lower-middle income countries - July 2016**

7  
8  
9  
10  
11  
12  
13  
14  
15  
16  
17  
18  
19  
20  
21  
22  
23  
24  
25  
26  
27  
28  
29  
30  
31  
32  
33  
34  
35  
36  
37  
38  
39  
40  
41  
42  
43  
44  
45  
46  
47  
48  
49  
50  
51  
52  
53  
54  
55  
56  
57  
58  
59  
60

| Country                  | Region                     | World Bank Class    |
|--------------------------|----------------------------|---------------------|
| Afghanistan              | South Asia                 | Low income          |
| Armenia                  | Europe & Central Asia      | Lower middle income |
| Bangladesh               | South Asia                 | Lower middle income |
| Benin                    | Sub-Saharan Africa         | Low income          |
| Bhutan                   | South Asia                 | Lower middle income |
| Bolivia                  | Latin America & Caribbean  | Lower middle income |
| Burkina Faso             | Sub-Saharan Africa         | Low income          |
| Burundi                  | Sub-Saharan Africa         | Low income          |
| Cabo Verde               | Sub-Saharan Africa         | Lower middle income |
| Cambodia                 | East Asia & Pacific        | Lower middle income |
| Cameroon                 | Sub-Saharan Africa         | Lower middle income |
| Central African Republic | Sub-Saharan Africa         | Low income          |
| Chad                     | Sub-Saharan Africa         | Low income          |
| Comoros                  | Sub-Saharan Africa         | Low income          |
| Congo, Dem. Rep.         | Sub-Saharan Africa         | Low income          |
| Congo, Rep.              | Sub-Saharan Africa         | Lower middle income |
| Côte d'Ivoire            | Sub-Saharan Africa         | Lower middle income |
| Djibouti                 | Middle East & North Africa | Lower middle income |
| Egypt, Arab Rep.         | Middle East & North Africa | Lower middle income |
| El Salvador              | Latin America & Caribbean  | Lower middle income |
| Eritrea                  | Sub-Saharan Africa         | Low income          |
| Ethiopia                 | Sub-Saharan Africa         | Low income          |
| Gambia, The              | Sub-Saharan Africa         | Low income          |
| Ghana                    | Sub-Saharan Africa         | Lower middle income |
| Guatemala                | Latin America & Caribbean  | Lower middle income |
| Guinea                   | Sub-Saharan Africa         | Low income          |
| Guinea-Bissau            | Sub-Saharan Africa         | Low income          |
| Haiti                    | Latin America & Caribbean  | Low income          |
| Honduras                 | Latin America & Caribbean  | Lower middle income |
| India                    | South Asia                 | Lower middle income |

|                           |                            |                     |
|---------------------------|----------------------------|---------------------|
| Indonesia                 | East Asia & Pacific        | Lower middle income |
| Kenya                     | Sub-Saharan Africa         | Lower middle income |
| Kiribati                  | East Asia & Pacific        | Lower middle income |
| Korea, Dem. People's Rep. | East Asia & Pacific        | Low income          |
| Kosovo                    | Europe & Central Asia      | Lower middle income |
| Kyrgyz Republic           | Europe & Central Asia      | Lower middle income |
| Lao PDR                   | East Asia & Pacific        | Lower middle income |
| Lesotho                   | Sub-Saharan Africa         | Lower middle income |
| Liberia                   | Sub-Saharan Africa         | Low income          |
| Madagascar                | Sub-Saharan Africa         | Low income          |
| Malawi                    | Sub-Saharan Africa         | Low income          |
| Mali                      | Sub-Saharan Africa         | Low income          |
| Mauritania                | Sub-Saharan Africa         | Lower middle income |
| Micronesia, Fed. Sts.     | East Asia & Pacific        | Lower middle income |
| Moldova                   | Europe & Central Asia      | Lower middle income |
| Mongolia                  | East Asia & Pacific        | Lower middle income |
| Morocco                   | Middle East & North Africa | Lower middle income |
| Mozambique                | Sub-Saharan Africa         | Low income          |
| Myanmar                   | East Asia & Pacific        | Lower middle income |
| Nepal                     | South Asia                 | Low income          |
| Nicaragua                 | Latin America & Caribbean  | Lower middle income |
| Niger                     | Sub-Saharan Africa         | Low income          |
| Nigeria                   | Sub-Saharan Africa         | Lower middle income |
| Pakistan                  | South Asia                 | Lower middle income |
| Papua New Guinea          | East Asia & Pacific        | Lower middle income |
| Philippines               | East Asia & Pacific        | Lower middle income |
| Rwanda                    | Sub-Saharan Africa         | Low income          |
| Samoa                     | East Asia & Pacific        | Lower middle income |
| São Tomé and Príncipe     | Sub-Saharan Africa         | Lower middle income |
| Senegal                   | Sub-Saharan Africa         | Low income          |
| Sierra Leone              | Sub-Saharan Africa         | Low income          |
| Solomon Islands           | East Asia & Pacific        | Lower middle income |
| Somalia                   | Sub-Saharan Africa         | Low income          |

|    |                      |                            |                     |
|----|----------------------|----------------------------|---------------------|
| 1  |                      |                            |                     |
| 2  |                      |                            |                     |
| 3  |                      |                            |                     |
| 4  | South Sudan          | Sub-Saharan Africa         | Low income          |
| 5  | Sri Lanka            | South Asia                 | Lower middle income |
| 6  |                      |                            |                     |
| 7  | Sudan                | Sub-Saharan Africa         | Lower middle income |
| 8  |                      |                            |                     |
| 9  | Swaziland            | Sub-Saharan Africa         | Lower middle income |
| 10 | Syrian Arab Republic | Middle East & North Africa | Lower middle income |
| 11 |                      |                            |                     |
| 12 | Tajikistan           | Europe & Central Asia      | Lower middle income |
| 13 |                      |                            |                     |
| 14 | Tanzania             | Sub-Saharan Africa         | Low income          |
| 15 | Timor-Leste          | East Asia & Pacific        | Lower middle income |
| 16 |                      |                            |                     |
| 17 | Togo                 | Sub-Saharan Africa         | Low income          |
| 18 | Tonga                | East Asia & Pacific        | Lower middle income |
| 19 |                      |                            |                     |
| 20 | Tunisia              | Middle East & North Africa | Lower middle income |
| 21 |                      |                            |                     |
| 22 | Uganda               | Sub-Saharan Africa         | Low income          |
| 23 |                      |                            |                     |
| 24 | Ukraine              | Europe & Central Asia      | Lower middle income |
| 25 | Uzbekistan           | Europe & Central Asia      | Lower middle income |
| 26 |                      |                            |                     |
| 27 | Vanuatu              | East Asia & Pacific        | Lower middle income |
| 28 | Vietnam              | East Asia & Pacific        | Lower middle income |
| 29 |                      |                            |                     |
| 30 | West Bank and Gaza   | Middle East & North Africa | Lower middle income |
| 31 | Yemen, Rep.          | Middle East & North Africa | Lower middle income |
| 32 |                      |                            |                     |
| 33 | Zambia               | Sub-Saharan Africa         | Lower middle income |
| 34 |                      |                            |                     |
| 35 | Zimbabwe             | Sub-Saharan Africa         | Low income          |
| 36 |                      |                            |                     |
| 37 |                      |                            |                     |
| 38 |                      |                            |                     |
| 39 |                      |                            |                     |
| 40 |                      |                            |                     |
| 41 |                      |                            |                     |
| 42 |                      |                            |                     |
| 43 |                      |                            |                     |
| 44 |                      |                            |                     |
| 45 |                      |                            |                     |
| 46 |                      |                            |                     |
| 47 |                      |                            |                     |
| 48 |                      |                            |                     |
| 49 |                      |                            |                     |
| 50 |                      |                            |                     |
| 51 |                      |                            |                     |
| 52 |                      |                            |                     |
| 53 |                      |                            |                     |
| 54 |                      |                            |                     |
| 55 |                      |                            |                     |
| 56 |                      |                            |                     |
| 57 |                      |                            |                     |
| 58 |                      |                            |                     |
| 59 |                      |                            |                     |
| 60 |                      |                            |                     |

**Table 2: Critical Care Service Delivery/ Interventions List**

*Monitoring/nursing*

Frequent monitoring/ surveillance and recording of clinical parameters [vital signs, pulse oximetry, capnography, etc.]

Acuity-based triage / performance of focused assessment for the critically ill [including shock, altered mental status, difficulty breathing, polytrauma, etc.]

Critical care nursing services [including implementation of higher than floor/ward-level care or nurse:patient ratio]

Frequent monitoring/ surveillance of fetus [fetal heart monitoring, tocometry, etc.]

*Interventions for hemodynamic instability/ organ dysfunction*

Support of hemodynamic instability and management of acute life threatening organ dysfunction

Titration of advanced parenteral therapeutics

|    |                                                                                                                                                                                                      |
|----|------------------------------------------------------------------------------------------------------------------------------------------------------------------------------------------------------|
| 1  |                                                                                                                                                                                                      |
| 2  |                                                                                                                                                                                                      |
| 3  |                                                                                                                                                                                                      |
| 4  | Intravenous fluid resuscitation                                                                                                                                                                      |
| 5  | Blood products transfusion                                                                                                                                                                           |
| 6  | Administration of advanced blood replacement therapies [e.g. plasmapheresis]                                                                                                                         |
| 7  | Massive hemorrhage control [including tourniquet application, hemostatic agents, pelvic binding]                                                                                                     |
| 8  | Targeted temperature management and hyperthermia / hypothermia management                                                                                                                            |
| 9  | Vasopressor/ inotrope administration                                                                                                                                                                 |
| 10 | Anti-arrhythmic medication administration for the critically ill                                                                                                                                     |
| 11 | Cardio-pulmonary resuscitation, basic only [chest compressions in the absence of invasive procedures]                                                                                                |
| 12 | Advanced cardiac life-support resuscitation [include emergent pacing, defibrillation, cardioversion]                                                                                                 |
| 13 | Spinal immobilization                                                                                                                                                                                |
| 14 | Extracorporeal membrane oxygenation (ECMO) / extracorporeal life support (ECLS)                                                                                                                      |
| 15 | Advanced trauma resuscitation / Advanced Trauma Life Support® (ATLS®) / WHO Trauma Care Checklist use                                                                                                |
| 16 |                                                                                                                                                                                                      |
| 17 |                                                                                                                                                                                                      |
| 18 | <i>Respiratory interventions</i>                                                                                                                                                                     |
| 19 | Support of respiratory insufficiency/ failure                                                                                                                                                        |
| 20 | Oxygen delivery, simple [face mask, nasal prongs]                                                                                                                                                    |
| 21 | Oxygen delivery, high flow [> 15 L/min]                                                                                                                                                              |
| 22 | Mechanical ventilation, non-invasive [including continuous positive airway pressure (CPAP)]                                                                                                          |
| 23 | Mechanical ventilation, invasive                                                                                                                                                                     |
| 24 | Non-invasive airway management [basic airway opening maneuvers, bag mask ventilation, oro- or nasopharyngeal airway placement, etc.]                                                                 |
| 25 | Advanced invasive airway management, non-surgical [tracheal intubation, laryngeal mask airway placement, bougie, airway exchange catheters, etc.]                                                    |
| 26 | Advanced surgical airway management [tracheostomy, cricothyrotomy performed outside the operating room/theatre]                                                                                      |
| 27 |                                                                                                                                                                                                      |
| 28 |                                                                                                                                                                                                      |
| 29 |                                                                                                                                                                                                      |
| 30 | <i>Other invasive procedures</i>                                                                                                                                                                     |
| 31 | Peripheral venous cannulation for the critically ill                                                                                                                                                 |
| 32 | Advanced vascular access [arterial lines, central venous / pulmonary artery catheters, intra-osseous access]                                                                                         |
| 33 | Thoracic invasive procedures for the critically ill [thoracostomy, pleural drain placement, thoracentesis, pericardiocentesis, emergent thoracotomy performed outside of the operating room/theatre] |
| 34 |                                                                                                                                                                                                      |
| 35 |                                                                                                                                                                                                      |
| 36 |                                                                                                                                                                                                      |
| 37 | <i>Additional targeted therapies</i>                                                                                                                                                                 |
| 38 | Early antibiotic administration for the critically ill                                                                                                                                               |
| 39 | Treatment of severe infections/ inflammation / sepsis [steroids and other adjuncts]                                                                                                                  |
| 40 |                                                                                                                                                                                                      |
| 41 |                                                                                                                                                                                                      |
| 42 |                                                                                                                                                                                                      |
| 43 |                                                                                                                                                                                                      |
| 44 |                                                                                                                                                                                                      |
| 45 |                                                                                                                                                                                                      |
| 46 |                                                                                                                                                                                                      |
| 47 |                                                                                                                                                                                                      |
| 48 |                                                                                                                                                                                                      |
| 49 |                                                                                                                                                                                                      |
| 50 |                                                                                                                                                                                                      |
| 51 |                                                                                                                                                                                                      |
| 52 |                                                                                                                                                                                                      |
| 53 |                                                                                                                                                                                                      |
| 54 |                                                                                                                                                                                                      |
| 55 |                                                                                                                                                                                                      |
| 56 |                                                                                                                                                                                                      |
| 57 |                                                                                                                                                                                                      |
| 58 |                                                                                                                                                                                                      |
| 59 |                                                                                                                                                                                                      |
| 60 |                                                                                                                                                                                                      |

|    |                                                                                                                                                                                                             |
|----|-------------------------------------------------------------------------------------------------------------------------------------------------------------------------------------------------------------|
| 1  |                                                                                                                                                                                                             |
| 2  |                                                                                                                                                                                                             |
| 3  |                                                                                                                                                                                                             |
| 4  | Renal replacement therapy / hemodialysis or peritoneal dialysis                                                                                                                                             |
| 5  | Monitoring and treatment of critical electrolyte/ metabolic/ acid base derangements                                                                                                                         |
| 6  |                                                                                                                                                                                                             |
| 7  | Nutrition management for the critically ill / injured                                                                                                                                                       |
| 8  |                                                                                                                                                                                                             |
| 9  | Provision of prophylaxis associated with critical illness [including alimentary, venous thromboembolism]                                                                                                    |
| 10 |                                                                                                                                                                                                             |
| 11 | Advanced burn care for the critically ill                                                                                                                                                                   |
| 12 |                                                                                                                                                                                                             |
| 13 | Emergent poisoning detoxification/ antidote                                                                                                                                                                 |
| 14 |                                                                                                                                                                                                             |
| 15 | Acute reperfusion therapy: medical or interventional [cardiac/coronary arteries]                                                                                                                            |
| 16 |                                                                                                                                                                                                             |
| 17 | Acute reperfusion therapy: medical or interventional [pulmonary embolism, or other acute thromboembolism]                                                                                                   |
| 18 |                                                                                                                                                                                                             |
| 19 | <i>Neurological interventions</i>                                                                                                                                                                           |
| 20 | Acute medical stabilization of critical neurologic illness / provision of neuroprotection for the critically ill [e.g. seizure management]                                                                  |
| 21 |                                                                                                                                                                                                             |
| 22 | Acute surgical stabilization of critical neurologic illness [e.g. emergent craniotomy, ventricular drain, intracranial pressure monitor performed outside the operating room/theatre]                       |
| 23 |                                                                                                                                                                                                             |
| 24 | Acute management of agitation/ delirium                                                                                                                                                                     |
| 25 |                                                                                                                                                                                                             |
| 26 | Acute reperfusion therapy: medical or interventional [neurovascular procedures for cerebrovascular pathology such as stenting, coiling performed outside the operating room/theatre]                        |
| 27 |                                                                                                                                                                                                             |
| 28 | Analgesia and sedation [sedative infusions, moderate / conscious sedation, up to general anesthesia, performed outside the operating room/theatre]                                                          |
| 29 |                                                                                                                                                                                                             |
| 30 |                                                                                                                                                                                                             |
| 31 |                                                                                                                                                                                                             |
| 32 | <i>Obstetrical critical care services</i>                                                                                                                                                                   |
| 33 | Obstetric critical care management [induction, tocolytic, high-risk labor, emergent/complex delivery, perimortem cesarean section performed outside the operating room/theatre]                             |
| 34 |                                                                                                                                                                                                             |
| 35 |                                                                                                                                                                                                             |
| 36 |                                                                                                                                                                                                             |
| 37 |                                                                                                                                                                                                             |
| 38 | <i>Diagnostic modalities</i>                                                                                                                                                                                |
| 39 | Utilization of targeted diagnostic strategy to establish timely etiology for the critically ill                                                                                                             |
| 40 |                                                                                                                                                                                                             |
| 41 | Basic radiography                                                                                                                                                                                           |
| 42 |                                                                                                                                                                                                             |
| 43 | Computed tomography                                                                                                                                                                                         |
| 44 |                                                                                                                                                                                                             |
| 45 | Magnetic resonance imaging                                                                                                                                                                                  |
| 46 |                                                                                                                                                                                                             |
| 47 | Critical care ultrasound, including point-of-care trans-thoracic / trans-oesophageal echocardiography                                                                                                       |
| 48 | Laboratory and other rapid results reporting including point-of-care diagnostics [arterial blood gas, glucometry, chemistry, hematology]                                                                    |
| 49 |                                                                                                                                                                                                             |
| 50 | Microbiology and other infectious rapid results reporting                                                                                                                                                   |
| 51 |                                                                                                                                                                                                             |
| 52 |                                                                                                                                                                                                             |
| 53 | <i>Multi-system processes related to critical care service delivery</i>                                                                                                                                     |
| 54 | Prognosis-based advance care planning [critical care level hospice/palliative, goals of care discussions, plan for de-escalation of care and transition to post-critical care needs appropriate to context] |
| 55 |                                                                                                                                                                                                             |
| 56 |                                                                                                                                                                                                             |
| 57 |                                                                                                                                                                                                             |
| 58 |                                                                                                                                                                                                             |
| 59 |                                                                                                                                                                                                             |
| 60 |                                                                                                                                                                                                             |

|    |                                                                                                               |
|----|---------------------------------------------------------------------------------------------------------------|
| 1  |                                                                                                               |
| 2  |                                                                                                               |
| 3  |                                                                                                               |
| 4  | Coordination of specialist services for multisystem illness [managing communication between, and coordination |
| 5  | of, various health care personnel caring for patient detailing diagnosis, treatment given, and disposition]   |
| 6  | Critical care triage / care pathways systems / clinical illness severity and/or risk stratification           |
| 7  | Critical care level crisis management [surge response, disaster management, multiple casualty incident]       |
| 8  |                                                                                                               |
| 9  | Health information systems, medical records                                                                   |
| 10 |                                                                                                               |
| 11 |                                                                                                               |
| 12 | <i>Other critical care services</i>                                                                           |
| 13 |                                                                                                               |
| 14 | Critical care pharmacy services                                                                               |
| 15 |                                                                                                               |
| 16 | Critical care education and capacity building [must have clinical service delivery component]                 |
| 17 |                                                                                                               |
| 18 | Other critical care intervention/ service delivery                                                            |
| 19 |                                                                                                               |
| 20 |                                                                                                               |
| 21 |                                                                                                               |
| 22 |                                                                                                               |
| 23 |                                                                                                               |
| 24 |                                                                                                               |
| 25 |                                                                                                               |
| 26 |                                                                                                               |
| 27 |                                                                                                               |
| 28 |                                                                                                               |
| 29 |                                                                                                               |
| 30 |                                                                                                               |
| 31 |                                                                                                               |
| 32 |                                                                                                               |
| 33 |                                                                                                               |
| 34 |                                                                                                               |
| 35 |                                                                                                               |
| 36 |                                                                                                               |
| 37 |                                                                                                               |
| 38 |                                                                                                               |
| 39 |                                                                                                               |
| 40 |                                                                                                               |
| 41 |                                                                                                               |
| 42 |                                                                                                               |
| 43 |                                                                                                               |
| 44 |                                                                                                               |
| 45 |                                                                                                               |
| 46 |                                                                                                               |
| 47 |                                                                                                               |
| 48 |                                                                                                               |
| 49 |                                                                                                               |
| 50 |                                                                                                               |
| 51 |                                                                                                               |
| 52 |                                                                                                               |
| 53 |                                                                                                               |
| 54 |                                                                                                               |
| 55 |                                                                                                               |
| 56 |                                                                                                               |
| 57 |                                                                                                               |
| 58 |                                                                                                               |
| 59 |                                                                                                               |
| 60 |                                                                                                               |

| <b>Table 3: Hierarchy of Exclusion for Full Text</b> |                                                                                                                            |
|------------------------------------------------------|----------------------------------------------------------------------------------------------------------------------------|
| <b>1</b>                                             | Not published from Jan 1 2008 - Jan 1 2020                                                                                 |
| <b>2</b>                                             | Is not a study on living humans, or is not related to health aspects of living humans (exclude animal or forensic studies) |
| <b>3</b>                                             | Does not address Low- or Low-middle income country (per World Bank Class 2016)                                             |
| <b>4</b>                                             | Does not address critical care service/interventions (per list in this spreadsheet)                                        |
| <b>5</b>                                             | Not Original Research, Systematic Review, or Brief Report                                                                  |
| <b>6</b>                                             | Does not describe where in healthcare setting critical care service/intervention is delivered                              |
| <b>7</b>                                             | Addresses exclusively peri-operative care that occurs in the operating room/theatre                                        |
| <b>8</b>                                             | Does not address care by healthcare professionals                                                                          |
| <b>9</b>                                             | Abstract-only, full text non-existent (for conference, poster/presentation, etc.)                                          |
| <b>10</b>                                            | Full text not available online                                                                                             |

Contributorship Statement:

AL is the guarantor, drafted, prepared, and submitted the manuscript, contributed to the development of the selection criteria, methodology, data extraction criteria and forms, developed and executed the search strategy, provided teaching and guidance of review process to review group.

NA, SM, SK, LL, ED, BC, NB, AB, MJ, PDS and TR provided comments and critical revisions to the manuscript, made substantial contributions to the conception and design of the review methodology and planned analysis.

ED, SK, PAS, MY, BC, PDS, MJ, RL, AR, CC, NB, NH, NS, PM, BV, NS, AB, CM, AGR, EB, AF, SY made key contributions to the conception, design and execution of eligibility criteria and methodology, participated in the acquisition and interpretation of reference data for screening phases, provided feedback on full text data extraction forms, and provided critical edits to the intellectual content of the manuscript.

All authors read, provided feedback and approved the final manuscript, and agree to be accountable for all aspects of the work in ensuring that questions related to the accuracy or integrity of any part of the work are appropriately investigated and resolved. Thus, all authors have met the four ICMJE criteria recommended for authorship.

Competing Interests Statement:

None declared.

Funding Statement:

There are no funders to report for this submission.



## References

- [1] Reynolds T, Sawe H, Rubiano A, *et al.* *Strengthening Health Systems to Provide Emergency Care. Disease Control Priorities: Improving Health and Reducing Poverty.* 3rd edition; 9(13). Washington, DC. The International Bank for Reconstruction and Development/The World Bank; 2017. <https://www.ncbi.nlm.nih.gov/books/NBK525279/> (accessed 10 June 2020).
- [2] Marshall JC, Bosco L, Adhikari NK, *et al.* What is an intensive care unit? A report of the task force of the World Federation of Societies of Intensive and Critical Care Medicine. *J Crit Care* 2017;37:270-276.
- [3] Herbert LJ, Wilson IJ. Pulse oximetry in low-resource settings. *Breathe* 2012;9:90-98.
- [4] Cameron PA, Gabbe BJ, Smith K, *et al.* Triaging the right patient to the right place in the shortest time. *Br J Anaesth* 2014;113(2):226-233.
- [5] Diaz JV, Riviello ED, Papali A, *et al.* Global Critical Care: Moving Forward in Resource-Limited Settings. *Ann Glob Health* 2019;85(1).
- [6] Murthy S, Adhikari NK. Global Health Care of the Critically Ill in Low-Resource Settings. *Ann Am Thorac Soc* 2013;10(5):509-513.
- [7] Mathers C, Fat DM, Boerma JT. *World Health Organization. The global burden of disease: 2004 update.* Geneva, Switzerland. World Health Organization; 2008.
- [8] Rudd KE, Johnson SC, Agesa KM, *et al.* Global, regional, and national sepsis incidence and mortality, 1990-2017: analysis for the Global Burden of Disease Study. *Lancet* 2020;395(10219):200-211.
- [9] Schultz MJ, Dunser MW, Dondorp AM, *et al.* Current challenges in the management of sepsis in ICUs in resource-poor settings and suggestions for the future. *Intensive Care Med* 2017;34:612-624.
- [10] Murthy S, Leligdowicz A, Adhikari N. Intensive Care Unit Capacity in Low-Income Countries: A Systematic Review. *PLoS One* 2015;10(1).
- [11] Murthy S, Adhikari NK. Global health care of the critically ill in low-resource settings. *Ann Am Thorac Soc* 2013;10(5):509-513.
- [12] Duke T, Graham SM, Cherian MN, *et al.* Oxygen is an essential medicine: a call for international action. *Int J Tuberc Lung Dis* 2010;14(11):1362-1368.

- 1  
2  
3 [13] Hansmann A, Morrow BM, Lang H. Review of supplemental oxygen and respiratory  
4 support for paediatric emergency care in sub-Saharan Africa. *Afr J Emerg Med* 2017;7:10-19.  
5  
6 [14] Thaddeus S, Maine D. Too far to walk: maternal mortality in context. *Soc Sci Med*  
7 1994;38:1091-1100.  
8  
9 [15] Cavallaro FL, Marchan TJ. Responsiveness of emergency obstetric care systems in low- and  
10 middle-income countries: a critical review of the “third delay”. *Acta obstetricia et gynecologica*  
11 *Scandinavica* 2018;92(5):496-507.  
12  
13 [16] Shanahan T, Risko N, Razzak J, *et al.* Aligning emergency care with global health priorities.  
14 *Int J Emerg* 2018;11(1):1-4.  
15  
16 [17] Mehmood A, Razzak JA, Kabir S. Development and pilot implementation of a locally  
17 developed Trauma Registry: lessons learnt in a low-income country. *BMC Emergency Medicine*  
18 2013;13(4).  
19  
20 [18] Reynold TA, Stewart B, Drewett I, *et al.* The Impact of Trauma Care Systems in Low- and  
21 Middle-Income Countries. *Annu Rev Public Health* 2017;38:507-532.  
22  
23 [19] World Health Organization. *WHO Emergency Care Systems Framework*.  
24 <https://www.who.int/publications/i/item/who-emergency-care-system-framework>  
25  
26 [20] World Health Organization. *WHO Universal Health Coverage Compendium*.  
27 <https://www.who.int/universal-health-coverage/compendium>  
28  
29  
30  
31  
32  
33  
34  
35  
36  
37  
38  
39  
40  
41  
42  
43  
44  
45  
46  
47  
48  
49  
50  
51  
52  
53  
54  
55  
56  
57  
58  
59  
60

## Appendix 1: Example search strategy: Pubmed/Medline

(((("Critical Care"[Mesh] OR "critical care"[tw] OR "Critical Illness"[Mesh] OR "Critical Illness"[tw] OR "Critical Care Nursing"[Mesh] OR "Critical Care Outcomes"[Mesh] OR "intensive care"[tw] OR "Intensive Care Units"[Mesh] OR "intermediate care unit"[tw] OR "step down unit"[tw] OR "Shock"[Mesh] OR "Cardiac Arrest"[tw] OR "heart arrest"[MeSH] OR "Respiratory Arrest"[tw] OR "Emergency Medicine"[Mesh] OR "Evidence-Based Emergency Medicine"[Mesh] OR "Emergency Nursing"[Mesh] OR "Emergency Treatment"[mh:noexp] OR "Advanced Trauma Life Support Care"[mesh] OR "Resuscitation"[mesh] OR "cardiopulmonary resuscitation"[tw] OR "Cardiopulmonary Resuscitation"[mesh] OR "Heart Massage"[mesh] OR "Respiration, Artificial"[mesh] OR ventilator\*[ti] OR icu[ti] OR picu[ti] OR nicu[ti] OR cu[ti] OR cpr[ti] OR "ambulances"[Mesh] OR "Emergency Service, Hospital"[mesh] OR "Poison Control Centers"[mesh] OR "Triage"[mh:noexp] OR "Hospital Rapid Response Team"[Mesh])) AND (((("Developing Countries"[Mesh] OR "Medically Underserved Area"[Mesh] OR "developing country"[tw] OR "developing countries"[tw] OR "developing nation"[tw] OR "developing nations"[tw] OR "developing population"[tw] OR "developing populations"[tw] OR "developing world"[tw] OR "less developed country"[tw] OR "less developed countries"[tw] OR "less developed nation"[tw] OR "less developed nations"[tw] OR "less developed population"[tw] OR "less developed populations"[tw] OR "less developed world"[tw] OR "lesser developed country"[tw] OR "lesser developed countries"[tw] OR "lesser developed nation"[tw] OR "lesser developed nations"[tw] OR "lesser developed population"[tw] OR "lesser developed populations"[tw] OR "lesser developed world"[tw] OR "under developed country"[tw] OR "under developed countries"[tw] OR "under developed nation"[tw] OR "under developed nations"[tw] OR "under developed population"[tw] OR "under developed populations"[tw] OR "under developed world"[tw] OR "underdeveloped country"[tw] OR "underdeveloped countries"[tw] OR "underdeveloped nation"[tw] OR "underdeveloped nations"[tw] OR "underdeveloped population"[tw] OR "underdeveloped populations"[tw] OR "underdeveloped world"[tw] OR "middle income country"[tw] OR "middle income countries"[tw] OR "middle income nation"[tw] OR "middle income nations"[tw] OR "middle income population"[tw] OR "middle income populations"[tw] OR "low income country"[tw] OR "low income countries"[tw] OR "low income nation"[tw] OR "low income nations"[tw] OR "low income population"[tw] OR "low income populations"[tw] OR "lower income country"[tw] OR "lower income countries"[tw] OR "lower income nation"[tw] OR "lower income nations"[tw] OR "lower income population"[tw] OR "lower income populations"[tw] OR "underserved country"[tw] OR "underserved countries"[tw] OR "underserved nation"[tw] OR "underserved nations"[tw] OR "underserved population"[tw] OR "underserved populations"[tw] OR "underserved world"[tw] OR "under served country"[tw] OR "under served countries"[tw] OR "under served nation"[tw] OR "under served nations"[tw] OR "under served population"[tw] OR "under served populations"[tw] OR "under served world"[tw] OR "deprived country"[tw] OR "deprived countries"[tw] OR "deprived nation"[tw] OR "deprived nations"[tw] OR "deprived population"[tw] OR "deprived populations"[tw] OR "deprived world"[tw] OR "poor country"[tw] OR "poor countries"[tw] OR "poor nation"[tw] OR "poor nations"[tw] OR "poor population"[tw] OR "poor populations"[tw] OR "poor world"[tw] OR "poorer country"[tw] OR "poorer countries"[tw] OR "poorer nation"[tw] OR "poorer nations"[tw] OR "poorer population"[tw] OR "poorer populations"[tw] OR "poorer world"[tw] OR "developing economy"[tw] OR "developing economies"[tw] OR "less developed economy"[tw] OR "less developed economies"[tw] OR "lesser developed economy"[tw] OR "lesser developed economies"[tw] OR "under developed economy"[tw] OR "under developed economies"[tw] OR "underdeveloped economy"[tw] OR "underdeveloped economies"[tw] OR "middle income economy"[tw] OR "middle income economies"[tw] OR "low income economy"[tw] OR "low income economies"[tw] OR "lower income economy"[tw] OR "lower income economies"[tw] OR "low gdp"[tw] OR "low gnp"[tw] OR "low gross domestic"[tw] OR "low gross national"[tw] OR "lower gdp"[tw] OR "lower gnp"[tw] OR "lower gross domestic"[tw] OR "lower gross national"[tw] OR "lami country"[tw] OR "lami countries"[tw] OR "transitional country"[tw] OR "transitional countries"[tw])) OR (Afghanistan[tw] OR "guatemala" [tw] OR "samoa" [tw] OR tonga OR "cape verde" [tw] OR Armenia [tw] OR Bangladesh[tw] OR Benin[tw] OR Bhutan[tw] OR Bolivia[tw] OR "Burkina Faso"[tw] OR Burundi[tw] OR "Cabo Verde"[tw] OR Cambodia[tw] OR Cameroon[tw] OR "Central African Republic"[tw] OR Chad[tw] OR Comoros[tw] OR Congo[tw] OR "Cote d'Ivoire"[tw] OR Djibouti[tw] OR Egypt[tw] OR "El Salvador"[tw] OR Eritrea[tw] OR Ethiopia[tw] OR Gambia[tw] OR Ghana[tw] OR Guinea[tw] OR "Guinea-Bissau"[tw] OR Haiti[tw] OR Honduras[tw] OR India[tw] OR Indonesia[tw] OR Kenya[tw] OR Kiribati[tw] OR "Democratic

1  
2  
3 People's Republic of Korea"[tw] OR "north korea"[tw] OR Kosovo[tw] OR Kyrgyzstan[tw] OR laos[tw] OR  
4 Lesotho[tw] OR Liberia[tw] OR Madagascar[tw] OR Malawi[tw] OR Mali[tw] OR Mauritania[tw] OR  
5 Micronesia[tw] OR Moldova[tw] OR Mongolia[tw] OR Morocco[tw] OR Mozambique[tw] OR Myanmar[tw] OR  
6 Nepal[tw] OR Nicaragua[tw] OR Niger[tw] OR Nigeria[tw] OR Pakistan[tw] OR "Papua New Guinea"[tw] OR  
7 Philippines[tw] OR Rwanda[tw] OR "Sao Tome"[tw] OR Principe[tw] OR Senegal[tw] OR "Sierra Leone"[tw]  
8 OR "Solomon Islands"[tw] OR Somalia[tw] OR "South Sudan"[tw] OR "Sri Lanka"[tw] OR Sudan[tw] OR  
9 Swaziland[tw] OR syria[tw] OR Tajikistan[tw] OR Tanzania[tw] OR "Timor-Leste"[tw] OR Togo[tw] OR  
10 Tunisia[tw] OR Uganda[tw] OR Ukraine[tw] OR Uzbekistan[tw] OR Vanuatu[tw] OR Vietnam[tw] OR "West  
11 Bank"[tw] OR Yemen[tw] OR Zambia[tw] OR Zimbabwe[tw] OR Kyrgyz[tw] OR Syrian[tw] OR "lao pdr"[tw]  
12 OR Burma[tw] OR gaza[tw] OR "ivory coast"[tw] OR Afghanistan[mesh] OR "guatemala" [mesh] OR "samoa"  
13 [mesh] OR tonga OR "cape verde" [mesh] OR Armenia [mesh] OR Bangladesh[mesh] OR Benin[mesh] OR  
14 Bhutan[mesh] OR Bolivia[mesh] OR "Burkina Faso"[mesh] OR Burundi[mesh] OR "Cabo Verde"[mesh] OR  
15 Cambodia[mesh] OR Cameroon[mesh] OR "Central African Republic"[mesh] OR Chad[mesh] OR  
16 Comoros[mesh] OR Congo[mesh] OR "Cote d'Ivoire"[mesh] OR Djibouti[mesh] OR Egypt[mesh] OR "El  
17 Salvador"[mesh] OR Eritrea[mesh] OR Ethiopia[mesh] OR Gambia[mesh] OR Ghana[mesh] OR Guinea[mesh]  
18 OR "Guinea-Bissau"[mesh] OR Haiti[mesh] OR Honduras[mesh] OR India[mesh] OR Indonesia[mesh] OR  
19 Kenya[mesh] OR Kiribati[mesh] OR "Democratic People's Republic of Korea"[mesh] OR Kosovo[mesh] OR  
20 Kyrgyzstan[mesh] OR laos[mesh] OR Lesotho[mesh] OR Liberia[mesh] OR Madagascar[mesh] OR  
21 Malawi[mesh] OR Mali[mesh] OR Mauritania[mesh] OR Micronesia[mesh] OR Moldova[mesh] OR  
22 Mongolia[mesh] OR Morocco[mesh] OR Mozambique[mesh] OR Myanmar[mesh] OR Nepal[mesh] OR  
23 Nicaragua[mesh] OR Niger[mesh] OR Nigeria[mesh] OR Pakistan[mesh] OR "Papua New Guinea"[mesh] OR  
24 Philippines[mesh] OR Rwanda[mesh] OR "Sao Tome and Principe"[mesh] OR Senegal[mesh] OR "Sierra  
25 Leone"[mesh] OR "melanesia"[mesh] OR Somalia[mesh] OR "South Sudan"[mesh] OR "Sri Lanka"[mesh] OR  
26 Sudan[mesh] OR Swaziland[mesh] OR syria[mesh] OR Tajikistan[mesh] OR Tanzania[mesh] OR "Timor-  
27 Leste"[mesh] OR Togo[mesh] OR Tunisia[mesh] OR Uganda[mesh] OR Ukraine[mesh] OR Uzbekistan[mesh]  
28 OR Vanuatu[mesh] OR Vietnam[mesh] OR Yemen[mesh] OR Zambia[mesh] OR Zimbabwe[mesh])) NOT  
29 ("Emergency Services, Psychiatric"[Mesh] OR "Addresses"[pt] OR "Autobiography"[pt] OR "Bibliography"[pt]  
30 OR "Biography"[pt] OR "Case Reports"[pt] OR "Comment"[pt] OR "Congresses"[pt] OR "Consensus  
31 Development Conference"[pt] OR "Consensus Development Conference, NIH"[pt] OR "Dictionary"[pt] OR  
32 "Directory"[pt] OR "Editorial"[pt] OR "Electronic Supplementary Materials"[pt] OR "Festschrift"[pt] OR  
33 "Historical Article"[pt] OR "Interactive Tutorial"[pt] OR "Interview"[pt] OR "Lectures"[pt] OR "Legal  
34 Cases"[pt] OR "Legislation"[pt] OR "Letter"[pt] OR "News"[pt] OR "Newspaper Article"[pt] OR "Overall"[pt]  
35 OR "Patient Education Handout"[pt] OR "Periodical Index"[pt] OR "Personal Narratives"[pt] OR  
36 "Portraits"[pt] OR "Practice Guideline"[pt] OR "Published Erratum"[pt] OR "Retracted Publication"[pt] OR  
37 "Retraction of Publication"[pt] OR "Technical Report"[pt] OR "Video-Audio Media"[pt] OR "Webcasts"[pt] OR  
38 "case report"[ti] OR bystand\*[ti])) AND english[lang] NOT ("animals"[mesh] NOT "humans"[mesh]) AND  
39 ("2008/01/01"[PDAT] : "3000/12/31"[PDAT])  
40  
41  
42  
43  
44  
45  
46  
47  
48  
49  
50  
51  
52  
53  
54  
55  
56  
57  
58  
59  
60

**PRISMA-P (Preferred Reporting Items for Systematic review and Meta-Analysis Protocols) 2015 checklist: recommended items to address in a systematic review protocol\***

| Section and topic                 | Item No | Checklist item                                                                                                                                                                                                                | Completed? |
|-----------------------------------|---------|-------------------------------------------------------------------------------------------------------------------------------------------------------------------------------------------------------------------------------|------------|
| <b>ADMINISTRATIVE INFORMATION</b> |         |                                                                                                                                                                                                                               |            |
| Title:                            |         |                                                                                                                                                                                                                               |            |
| Identification                    | 1a      | Identify the report as a protocol of a systematic review                                                                                                                                                                      | X          |
|                                   | 1b      | If the protocol is for an update of a previous systematic review, identify as such                                                                                                                                            | N/A        |
| Registration                      | 2       | If registered, provide the name of the registry (such as PROSPERO) and registration number                                                                                                                                    | X          |
| Authors:                          |         |                                                                                                                                                                                                                               |            |
| Contact                           | 3a      | Provide name, institutional affiliation, e-mail address of all protocol authors; provide physical mailing address of corresponding author                                                                                     | X          |
|                                   | 3b      | Describe contributions of protocol authors and identify the guarantor of the review                                                                                                                                           | X          |
| Contributions                     | 4       | If the protocol represents an amendment of a previously completed or published protocol, identify as such and list changes; otherwise, state plan for documenting important protocol amendments                               | N/A        |
| Support:                          |         |                                                                                                                                                                                                                               |            |
| Sources                           | 5a      | Indicate sources of financial or other support for the review                                                                                                                                                                 | X          |
| Sponsor                           | 5b      | Provide name for the review funder and/or sponsor                                                                                                                                                                             | X          |
| Role of sponsor or funder         | 5c      | Describe roles of funder(s), sponsor(s), and/or institution(s), if any, in developing the protocol                                                                                                                            | X          |
| <b>INTRODUCTION</b>               |         |                                                                                                                                                                                                                               |            |
| Rationale                         | 6       | Describe the rationale for the review in the context of what is already known                                                                                                                                                 | X          |
| Objectives                        | 7       | Provide an explicit statement of the question(s) the review will address with reference to participants, interventions, comparators, and outcomes (PICO)                                                                      | X          |
| <b>METHODS</b>                    |         |                                                                                                                                                                                                                               |            |
| Eligibility criteria              | 8       | Specify the study characteristics (such as PICO, study design, setting, time frame) and report characteristics (such as years considered, language, publication status) to be used as criteria for eligibility for the review | X          |
| Information sources               | 9       | Describe all intended information sources (such as electronic databases, contact with study authors, trial registers or other grey literature sources) with planned dates of coverage                                         | X          |
| Search strategy                   | 10      | Present draft of search strategy to be used for at least one electronic database, including planned limits, such that it could be repeated                                                                                    | X          |
| Study records:                    |         |                                                                                                                                                                                                                               |            |
| Data management                   | 11a     | Describe the mechanism(s) that will be used to manage records and data throughout the review                                                                                                                                  | X          |
| Selection process                 | 11b     | State the process that will be used for selecting studies (such as two independent reviewers) through each phase of the review (that is, screening, eligibility and inclusion in meta-analysis)                               | X          |

|                                    |     |                                                                                                                                                                                                                                                  |     |
|------------------------------------|-----|--------------------------------------------------------------------------------------------------------------------------------------------------------------------------------------------------------------------------------------------------|-----|
| Data collection process            | 11c | Describe planned method of extracting data from reports (such as piloting forms, done independently, in duplicate), any processes for obtaining and confirming data from investigators                                                           | X   |
| Data items                         | 12  | List and define all variables for which data will be sought (such as PICO items, funding sources), any pre-planned data assumptions and simplifications                                                                                          | X   |
| Outcomes and prioritization        | 13  | List and define all outcomes for which data will be sought, including prioritization of main and additional outcomes, with rationale                                                                                                             | X   |
| Risk of bias in individual studies | 14  | Describe anticipated methods for assessing risk of bias of individual studies, including whether this will be done at the outcome or study level, or both; state how this information will be used in data synthesis                             | X   |
| Data synthesis                     | 15a | Describe criteria under which study data will be quantitatively synthesized                                                                                                                                                                      | N/A |
|                                    | 15b | If data are appropriate for quantitative synthesis, describe planned summary measures, methods of handling data and methods of combining data from studies, including any planned exploration of consistency (such as $I^2$ , Kendall's $\tau$ ) | N/A |
|                                    | 15c | Describe any proposed additional analyses (such as sensitivity or subgroup analyses, meta-regression)                                                                                                                                            | N/A |
|                                    | 15d | If quantitative synthesis is not appropriate, describe the type of summary planned                                                                                                                                                               | X   |
| Meta-bias(es)                      | 16  | Specify any planned assessment of meta-bias(es) (such as publication bias across studies, selective reporting within studies)                                                                                                                    | N/A |
| Confidence in cumulative evidence  | 17  | Describe how the strength of the body of evidence will be assessed (such as GRADE)                                                                                                                                                               | N/A |

**\* It is strongly recommended that this checklist be read in conjunction with the PRISMA-P Explanation and Elaboration (cite when available) for important clarification on the items. Amendments to a review protocol should be tracked and dated. The copyright for PRISMA-P (including checklist) is held by the PRISMA-P Group and is distributed under a Creative Commons Attribution Licence 4.0.**

*From: Shamseer L, Moher D, Clarke M, Ghersi D, Liberati A, Petticrew M, Shekelle P, Stewart L, PRISMA-P Group. Preferred reporting items for systematic review and meta-analysis protocols (PRISMA-P) 2015: elaboration and explanation. BMJ. 2015 Jan 2;349(jan02 1):g7647.*

# BMJ Open

## Critical care service delivery across healthcare systems in low- and low-middle income countries: Protocol for a Systematic Review

|                               |                                                                                                                                                                                                                                                                                                                                                                                                                                                                                                                                                                                                                                                                                                                                                                                                                                                                                                                                                                                                                                                                                                                                                                                                                                                                                                                                                                                                                                                                                                                                                                                                                                                                                                                                                                                                                                                                                                                                                                                                                                                             |
|-------------------------------|-------------------------------------------------------------------------------------------------------------------------------------------------------------------------------------------------------------------------------------------------------------------------------------------------------------------------------------------------------------------------------------------------------------------------------------------------------------------------------------------------------------------------------------------------------------------------------------------------------------------------------------------------------------------------------------------------------------------------------------------------------------------------------------------------------------------------------------------------------------------------------------------------------------------------------------------------------------------------------------------------------------------------------------------------------------------------------------------------------------------------------------------------------------------------------------------------------------------------------------------------------------------------------------------------------------------------------------------------------------------------------------------------------------------------------------------------------------------------------------------------------------------------------------------------------------------------------------------------------------------------------------------------------------------------------------------------------------------------------------------------------------------------------------------------------------------------------------------------------------------------------------------------------------------------------------------------------------------------------------------------------------------------------------------------------------|
| Journal:                      | <i>BMJ Open</i>                                                                                                                                                                                                                                                                                                                                                                                                                                                                                                                                                                                                                                                                                                                                                                                                                                                                                                                                                                                                                                                                                                                                                                                                                                                                                                                                                                                                                                                                                                                                                                                                                                                                                                                                                                                                                                                                                                                                                                                                                                             |
| Manuscript ID                 | bmjopen-2020-048423.R1                                                                                                                                                                                                                                                                                                                                                                                                                                                                                                                                                                                                                                                                                                                                                                                                                                                                                                                                                                                                                                                                                                                                                                                                                                                                                                                                                                                                                                                                                                                                                                                                                                                                                                                                                                                                                                                                                                                                                                                                                                      |
| Article Type:                 | Protocol                                                                                                                                                                                                                                                                                                                                                                                                                                                                                                                                                                                                                                                                                                                                                                                                                                                                                                                                                                                                                                                                                                                                                                                                                                                                                                                                                                                                                                                                                                                                                                                                                                                                                                                                                                                                                                                                                                                                                                                                                                                    |
| Date Submitted by the Author: | 22-Apr-2021                                                                                                                                                                                                                                                                                                                                                                                                                                                                                                                                                                                                                                                                                                                                                                                                                                                                                                                                                                                                                                                                                                                                                                                                                                                                                                                                                                                                                                                                                                                                                                                                                                                                                                                                                                                                                                                                                                                                                                                                                                                 |
| Complete List of Authors:     | <p>Lim, Andrew; Virginia Mason Medical Center, Section of Critical Care Medicine; Stanford University, Division of Critical Care Medicine</p> <p>Kivlehan, Sean; Brigham and Women's Hospital, Department of Emergency Medicine; Harvard University</p> <p>Losonczy, Lia; The George Washington University Medical Center, Department of Emergency Medicine, Department of Anaesthesia &amp; Critical Care Medicine</p> <p>Murthy, Srinivas; University of British Columbia, Department of Paediatrics</p> <p>Dippenaar, Enrico; Anglia Ruskin University, Emergency Medicine Research Group</p> <p>Lowsby, Richard; Mid Cheshire Hospitals NHS Foundation Trust, Department of Critical Care Medicine, Department of Emergency Medicine</p> <p>Yang, Marc Li Chuan; The Chinese University of Hong Kong Faculty of Medicine, Accident and Emergency Medicine</p> <p>Jaung, Michael ; Baylor College of Medicine, Department of Emergency Medicine</p> <p>Stephens, P. Andrew ; Cleveland Clinic Foundation, Department of Emergency Medicine, Intensive Care &amp; Resuscitation</p> <p>Benzoni, Nicole; Washington University School of Medicine in Saint Louis, Division of Pulmonary &amp; Critical Care Medicine</p> <p>Sefa, Nana; University of Michigan Medical School, Department of Emergency Medicine</p> <p>Bartlett, Emily; University of Washington, Department of Emergency Medicine</p> <p>Chaffay, Brandon; The George Washington University Hospital, Department of Emergency Medicine</p> <p>Haridasa, Naeha; The George Washington University School of Medicine and Health Sciences</p> <p>Velasco, Bernadett ; East Avenue Medical Center, Department of Emergency Medicine</p> <p>Yi, Sojung ; University of California San Francisco, Department of Emergency Medicine</p> <p>Contag, Caitlin; Stanford University, Department of Medicine</p> <p>Rashed, Amir; Jacobi Medical Center, Department of Emergency Medicine</p> <p>McCarville, Patrick; The George Washington University Hospital, Department of Emergency Medicine</p> |

|                                 |                                                                                                                                                                                                                                                                                                                                                                                                                                                                                                                                                                                                                                                                                                                                                                  |
|---------------------------------|------------------------------------------------------------------------------------------------------------------------------------------------------------------------------------------------------------------------------------------------------------------------------------------------------------------------------------------------------------------------------------------------------------------------------------------------------------------------------------------------------------------------------------------------------------------------------------------------------------------------------------------------------------------------------------------------------------------------------------------------------------------|
|                                 | Sonenthal, Paul; Brigham and Women's Hospital, Division of Pulmonary & Critical Care Medicine; Harvard Medical School<br>Shukur, Nebiyu ; The George Washington University Hospital, Department of Emergency Medicine<br>Bellou, Abdelouahab; Harvard Medical School, Department of Emergency Medicine<br>Mickman, Carl; Mount Sinai Hospital, Department of Emergency Medicine<br>Ghatak-Roy, Adhiti; The George Washington University School of Medicine and Health Sciences, Emergency Medicine<br>Ferreira, Allison; University of California Los Angeles, Department of Emergency Medicine<br>Adhikari, Neill; Sunnybrook Health Sciences Centre and University of Toronto, Division of Critical Care Medicine<br>Reynolds, Teri; World Health Organization |
| <b>Primary Subject Heading</b>: | Global health                                                                                                                                                                                                                                                                                                                                                                                                                                                                                                                                                                                                                                                                                                                                                    |
| Secondary Subject Heading:      | Emergency medicine, Intensive care, Cardiovascular medicine, Health services research, Paediatrics                                                                                                                                                                                                                                                                                                                                                                                                                                                                                                                                                                                                                                                               |
| Keywords:                       | ACCIDENT & EMERGENCY MEDICINE, Adult intensive & critical care < ANAESTHETICS, Paediatric intensive & critical care < ANAESTHETICS, Organisation of health services < HEALTH SERVICES ADMINISTRATION & MANAGEMENT, International health services < HEALTH SERVICES ADMINISTRATION & MANAGEMENT, Neonatal intensive & critical care < INTENSIVE & CRITICAL CARE                                                                                                                                                                                                                                                                                                                                                                                                   |
|                                 |                                                                                                                                                                                                                                                                                                                                                                                                                                                                                                                                                                                                                                                                                                                                                                  |

SCHOLARONE™  
Manuscripts





I, the Submitting Author has the right to grant and does grant on behalf of all authors of the Work (as defined in the below author licence), an exclusive licence and/or a non-exclusive licence for contributions from authors who are: i) UK Crown employees; ii) where BMJ has agreed a CC-BY licence shall apply, and/or iii) in accordance with the terms applicable for US Federal Government officers or employees acting as part of their official duties; on a worldwide, perpetual, irrevocable, royalty-free basis to BMJ Publishing Group Ltd ("BMJ") its licensees and where the relevant Journal is co-owned by BMJ to the co-owners of the Journal, to publish the Work in this journal and any other BMJ products and to exploit all rights, as set out in our [licence](#).

The Submitting Author accepts and understands that any supply made under these terms is made by BMJ to the Submitting Author unless you are acting as an employee on behalf of your employer or a postgraduate student of an affiliated institution which is paying any applicable article publishing charge ("APC") for Open Access articles. Where the Submitting Author wishes to make the Work available on an Open Access basis (and intends to pay the relevant APC), the terms of reuse of such Open Access shall be governed by a Creative Commons licence – details of these licences and which [Creative Commons](#) licence will apply to this Work are set out in our licence referred to above.

Other than as permitted in any relevant BMJ Author's Self Archiving Policies, I confirm this Work has not been accepted for publication elsewhere, is not being considered for publication elsewhere and does not duplicate material already published. I confirm all authors consent to publication of this Work and authorise the granting of this licence.

1  
2  
3 1 **Title:** Critical care service delivery across healthcare systems in low- and low-middle income  
4 2 countries: Protocol for a Systematic Review  
5 3

6 4 In accordance with the guidelines, our systematic review protocol was registered with the  
7 5 International Prospective Register of Systematic Reviews (PROSPERO) on 29 October, 2019  
8 6 and was last updated on 21 April, 2020 (registration number CRD42019146802). In the event of  
9 7 protocol amendments, the date of each amendment will be accompanied by a description of the  
10 8 change and the rationale.  
11 9

12  
13  
14 10 Authors:

15 11 Andrew G Lim (Virginia Mason Medical Center, Section of Critical Care Medicine  
16 12 Seattle, WA, USA; Stanford University, Division of Critical Care Medicine, Stanford, CA, USA)  
17 13 Sean M Kivlehan (Brigham and Women's Hospital, Department of Emergency Medicine,  
18 14 Boston, MA, USA; Harvard University, Cambridge, MA, USA)  
19 15 Lia Losonczy (The George Washington University Medical Center, Department of Emergency  
20 16 Medicine, Department of Anaesthesia & Critical Care Medicine, Washington, DC, USA)  
21 17 Srinivas Murthy (University of British Columbia, Department of Paediatrics, Vancouver, BC,  
22 18 CAN)  
23 19 Enrico Dippenaar (Anglia Ruskin University, Emergency Medicine Research Group,  
24 20 Chelmsford, Essex, UK)  
25 21 Richard Lowsby (Mid Cheshire Hospitals NHS Foundation Trust, Department of Critical Care  
26 22 Medicine, Department of Emergency Medicine, Cheshire, Cheshire, UK)  
27 23 Marc Yang (The Chinese University of Hong Kong Faculty of Medicine, Accident and  
28 24 Emergency Medicine, Hong Kong, HK)  
29 25 Michael Jaung (Baylor College of Medicine, Department of Emergency Medicine, Houston, TX,  
30 26 USA)  
31 27 P. Andrew Stephens (Cleveland Clinic Foundation, Department of Emergency Medicine,  
32 28 Intensive Care & Resuscitation, Cleveland, OH, USA)  
33 29 Nicole Benzoni (Washington University School of Medicine in Saint Louis, Division of  
34 30 Pulmonary & Critical Care Medicine, Saint Louis, MO, USA)  
35 31 Nana Sefa (University of Michigan Medical School, Department of Emergency Medicine, Ann  
36 32 Arbor, MI, USA)  
37 33 Emily Bartlett (University of Washington, Department of Emergency Medicine, Seattle, WA,  
38 34 USA)  
39 35 Brandon Chaffay (The George Washington University Hospital, Department of Emergency  
40 36 Medicine, Washington, DC, USA)  
41 37 Naeha Haridasa (The George Washington University School of Medicine and Health Sciences,  
42 38 Washington, DC, USA)  
43 39 Bernadett Velasco (East Avenue Medical Center, Department of Emergency Medicine, Quezon  
44 40 City, National Capital Region, PH)  
45 41 Sojung Yi (University of California San Francisco, Department of Emergency Medicine, San  
46 42 Francisco, CA, USA)  
47 43 Caitlin Contag (Stanford University, Department of Medicine, Palo Alto, CA, USA)  
48 44 Amir Rashed (Jacobi Medical Center, Department of Emergency Medicine, Bronx, NY, USA)  
49 45 Patrick McCarville (The George Washington University Hospital, Department of Emergency  
50 46 Medicine, Washington, DC, USA)  
51  
52  
53  
54  
55  
56  
57  
58  
59  
60

1  
2  
3 47 Paul D Sonenthal (Brigham and Women's Hospital, Division of Pulmonary & Critical Care  
4 48 Medicine, Boston, MA, USA; Harvard Medical School, Boston, MA, USA)  
5 49 Nebiyu Shukur (The George Washington University Hospital, Department of Emergency  
6 50 Medicine, Washington, DC, USA)  
7 51 Abdellouahab Bellou (Harvard Medical School, Department of Emergency Medicine, Boston,  
8 52 MA, USA)  
9 53 Carl Mickman (Mount Sinai Hospital, Department of Emergency Medicine, New York, NY,  
10 54 USA)  
11 55 Adhiti Ghatak-Roy (The George Washington University School of Medicine and Health  
12 56 Sciences, Emergency Medicine, Washington, DC, USA)  
13 57 Allison Ferreira (University of California Los Angeles, Department of Emergency Medicine, Los  
14 58 Angeles, CA, USA)  
15 59 Neill KJ Adhikari\* (Sunnybrook Health Sciences Centre and University of Toronto, Division of  
16 60 Critical Care Medicine, Toronto, CAN)  
17 61 Teri Reynolds\* (World Health Organization, Geneva, GE, CH)  
18  
19  
20  
21  
22  
23  
24

25 62  
26 63 The authors represent the International Federation for Emergency Medicine – Critical Care  
27 64 Review Consortium (IFEM-CCRC)  
28  
29  
30  
31

32 65  
33 66 Corresponding author:

34 67 Andrew G Lim

35 68 Email: andrewglim@gmail.com

36 69 Mailing Address: Virginia Mason Medical Center, Division of Critical Care Medicine, 1100 9th  
37 70 Ave, Seattle, WA 98101  
38  
39  
40

41 71  
42 72 Acknowledgments:

43 73 We would like to thank Christopher Donald Stave (Stanford University Library Services) and  
44 74 Tomas Allen (WHO Library) for their assistance in developing the literature search strategy and  
45 75 Elsa Courdier (WHO) for manuscript preparation.  
46  
47  
48  
49

50 76  
51 77 Other technical support was provided by the International Federation for Emergency Medicine  
52 78 (IFEM), and the IFEM Special Interest Group for Critical Care in Emergency Medicine.  
53  
54  
55  
56

57 79  
58 80 \* NKJA and TR contributed equally to this work and are co-senior authors.  
59 81  
60 82

## Abstract

**Introduction:** Critical care in low- and low-middle income countries (LLMICs) is an underdeveloped component of the healthcare system. Given the increasing growth in demand for critical care services in LLMICs, understanding the current capacity to provide critical care is imperative to inform policy on service expansion. Thus, our aim is to describe the provision of critical care in LLMICs with respect to patients, providers, location of care, and services and interventions delivered.

**Methods & Analysis:** We will search PubMed/MEDLINE, Web of Science, and EMBASE for full-text original research articles available in English describing critical care services that specify the location of service delivery and describe patients and interventions. We will restrict our review to populations from LLMICs (using 2016 World Bank classifications) and published from January 1, 2008 to January 1, 2020. Two-reviewer agreement will be required for both title/abstract and full text review stages, and rate of agreement will be calculated for each stage. We will extract data regarding the location of critical care service delivery, the training of the healthcare professionals providing services, and the illnesses treated according to classification by the World Health Organization (WHO) Universal Health Coverage (UHC) Compendium.

**Ethics & Dissemination:** Reviewed and exempted by the Stanford University Office for Human Subjects Research and IRB on May 20, 2020. The results of this review will be disseminated through scholarly publication and presentation at regional and international conferences. This review is designed to inform broader WHO, IFEM and partner efforts to strengthen critical care globally.

1  
2  
3 107 **Registration:** Registered with the International Prospective Register of Systematic Reviews  
4  
5 108 (PROSPERO) on 29 October, 2019 and last updated on 21 April, 2020 (registration number  
6  
7 109 CRD42019146802).  
8  
9

10 110  
11 111  
12  
13  
14  
15  
16  
17  
18  
19  
20  
21  
22  
23  
24  
25  
26  
27  
28  
29  
30  
31  
32  
33  
34  
35  
36  
37  
38  
39  
40  
41  
42  
43  
44  
45  
46  
47  
48  
49  
50  
51  
52  
53  
54  
55  
56  
57  
58  
59  
60

For peer review only

1  
2  
3 112 **Strengths and Limitations of this Study:**  
4

- 5 113 • To our knowledge, this will be the first systematic review of published literature to  
6  
7 114 comprehensively describe the spectrum of critical care services in healthcare settings  
8  
9 115 across low and lower-middle income countries (LLMICs).  
10  
11 116 • We will use standard methods (comprehensive search, training exercises for reviewers,  
12  
13 117 iterative process for conflict resolution) to maximise the rigour of this review.  
14  
15 118 • A multidisciplinary and multinational team identified through World Health Organization  
16  
17 119 (WHO) and International Federation for Emergency Medicine (IFEM) networks will  
18  
19 120 conduct this review.  
20  
21 121 • The scope of the review question is large, which will help to inform public policy but  
22  
23 122 does not allow for meta-analysis to answer a focused clinical question.  
24  
25 123 • There is a large number of reviewers involved in article selection, such that the threshold  
26  
27 124 for inclusion of studies in the review may vary by reviewer pair and may lead to  
28  
29 125 underestimation of the types or characteristics of critical care services delivered.  
30  
31  
32  
33  
34  
35  
36  
37  
38  
39  
40  
41  
42  
43  
44  
45  
46  
47  
48  
49  
50  
51  
52  
53  
54  
55  
56  
57  
58  
59  
60

## 127 **Introduction**

128 Acute illness can occur at any point in the healthcare system, and requires recognition,  
129 resuscitation and stabilisation, along with definitive care. The WHO Emergency Care Systems  
130 Framework (ECSF) characterises acute illness as disease or injury processes in which delays can  
131 “...worsen prognosis or render care less effective”. [1] This broad scope requires multiple  
132 healthcare partners in an integrated system to triage acuity, transport patients, and manage acute  
133 illness with infrastructure and personnel. Patients with acute illness often receive critical care,  
134 which includes interventions to support failing organ systems and prevent further deterioration  
135 while the underlying disease is treated. [2] Critical care interventions vary in technical  
136 complexity and location of delivery. Although mechanical ventilation in an intensive care unit  
137 (ICU) is a classic example, supplemental oxygen, intravenous fluids, and close monitoring and  
138 assessment by nurses and physicians all contribute to the maintenance of basic physiologic  
139 functions. [3, 4]

140

### 141 *Critical care services in low-resource settings*

142 Critical illness is thought to have a higher incidence and mortality in low and low-middle income  
143 countries (LLMICs) [5-7], as shown recently with Global Burden of Disease data for sepsis [8].  
144 The burden is expected to grow because of increasing urbanisation, incidence of non-  
145 communicable disease and injury, and population life expectancy. The higher burden of critical  
146 illness in LLMICs is not matched by capacity in equipment, infrastructure, and healthcare  
147 workforce number and education [9-15] leading to excess mortality [16] that is not well-  
148 documented because of poor epidemiologic data and clinical research [17, 18]. Because of the  
149 lack of ICU capacity, critically ill patients may be managed in non-traditional environments,  
150 including hospital wards, emergency care units, or in pre-hospital settings.

151

152 *Objectives*

153 The primary objective of our systematic review is to characterise the range of critical care  
154 services and interventions delivered across the healthcare system in LLMICs by reviewing  
155 reports published from January 1, 2008 to January 1, 2020. We aim to characterise the health  
156 service location in which these services or interventions are delivered, the healthcare  
157 professionals involved, and the conditions being treated.

158

159 **Methods**160 *Eligibility criteria*

161 Studies will be eligible for inclusion if they meet the following criteria:

162 1) Study design: original, peer reviewed research articles (including cross-sectional, case-control,  
163 and cohort studies, randomised controlled trials, qualitative methods, and mixed methods  
164 studies) and systematic reviews that describe critical care services as defined below. We will  
165 exclude case reports and series, study protocols, studies available only as abstracts (e.g.  
166 conference abstracts, poster presentations, etc.), and other unpublished studies. We will only  
167 include studies with online full-text availability.

168 2) Setting: LLMICs, as per the 2016 World Bank classification (Table 1). We decided to use the  
169 2016 World Bank classification as a reference point, as the earlier classification is likely to  
170 capture more accurately the LLMICs during the time period from which the included studies  
171 originate (2008-2020). Within LLMICs, we will include studies that describe the location of  
172 delivery of critical care services delivered by health care professionals in any setting. We will  
173 exclude studies describing out-of-hospital settings where care is delivered by lay providers, and



1  
2  
3 174 critical care delivered in operating rooms as part of a surgical procedure (but will include studies  
4  
5 175 on critical care in pre- or post-operative care environments). Our rationale is that critical care  
6  
7 176 delivered as part of surgical anaesthesia is often linked to the need for anaesthesia itself rather  
8  
9 177 than to any critical illness. We will exclude studies of military health operations by high or high-  
10  
11 178 middle income country armed forces operating in LLMICs whose treatment populations  
12  
13 179 exclusively consist of military personnel.

14  
15 180 3) Participants: any age group.

16  
17 181 4) Interventions: critical care services, including medical interventions, diagnostic modalities  
18  
19 182 (including radiology, laboratory testing, and microbiology) for the diagnosis or prognostication  
20  
21 183 of critical illness states, pharmaceutical services, and healthcare systems-based processes  
22  
23 184 (including advance care planning; coordination of specialist services, critical care triage or care  
24  
25 185 pathways; crisis, surge, mass casualty, and disaster management (Table 2). This list reflects a  
26  
27 186 broad perspective of critical care services and is informed by the World Health Organization  
28  
29 187 (WHO) Emergency and Critical Care Services Framework (ECSF) [19].

30  
31 188 We will include studies that describe critical care service utilisation as a study intervention,  
32  
33 189 exposure, or outcome, including studies of capacity building or education if they also involve  
34  
35 190 service delivery for patients. We will exclude simulated interventions.

36  
37 191 5) Timing: studies published from January 1, 2008 to January 1, 2020. This date range  
38  
39 192 encompasses the contemporaneous provision of critical care studied before the onset of the  
40  
41 193 global COVID-19 pandemic.

42  
43 194 6) Language: studies available in English language through search filters.

44  
45 195

1  
2  
3 196 *Information sources*  
4

5 197 Our databases include PubMed/MEDLINE, EMBASE, and Web of Science, supplemented by  
6  
7 198 scanning of reference lists of relevant systematic reviews and searches of WHO intranet  
8  
9  
10 199 databases. We will not consider grey literature due to the large scope of the review question and  
11  
12 200 the desire to focus on peer reviewed studies.  
13

14 201

15  
16  
17 202 *Search strategies*  
18

19 203 Literature search strategies were developed by the authors in conjunction with a Stanford  
20  
21 204 University Health Sciences librarian (CDS) with expertise in systematic review searching, with  
22  
23 205 technical support from WHO Library services (TA). We used controlled vocabulary terms and  
24  
25 206 text words related to critical care in LLMICs (see Appendix 1 for PubMed/MEDLINE search  
26  
27 207 strategy, subsequently adapted to EMBASE and Web of Science). We also searched PROSPERO  
28  
29 208 for ongoing or recently completed systematic reviews. We restricted search results to citations in  
30  
31 209 English pertaining to humans, published from January 1, 2008 to January 1, 2020.  
32  
33

34 210

35  
36  
37 211 *Study records*  
38

39 212 Literature search results will be uploaded to Covidence (Covidence ©, Melbourne, Australia), a  
40  
41 213 web-based online platform that facilitates collaboration among reviewers during systematic  
42  
43 214 review study selection. Full text articles will be uploaded to Covidence during the full-text  
44  
45 215 review phase.  
46  
47

48 216

49 217 *Selection Process*  
50  
51  
52  
53  
54  
55  
56  
57  
58  
59  
60

1  
2  
3 218 Reviewers will be unblinded to author and institution details of citations. To maximise  
4  
5 219 consistency in assessing inclusion and exclusion criteria among 21 reviewers, we plan calibration  
6  
7 220 pilot exercises for title and abstract screening and group discussions using Google Groups  
8  
9  
10 221 (Google ©, Mountain View, California, U.S.A.) and online group videoconferencing. This  
11  
12 222 training will emphasise the need for sensitivity in citation selection in the title and abstract phase.  
13  
14 223 Independently and in duplicate, reviewers will screen titles and abstracts for potentially relevant  
15  
16 224 studies using Covidence. Because of the anticipated very large number of potentially relevant  
17  
18 225 citations, the agreement of two members of the review team will be required for citation  
19  
20 226 selection at the title and abstract phase; disagreements will be adjudicated by a third reviewer.  
21  
22 227 Full-text versions of citations included at the title and abstract screening phase will be retrieved  
23  
24 228 and reviewed by the same team of reviewers. If full-text is not retrievable by at least two  
25  
26 229 reviewers, including efforts to contact the study authors directly, the study will be excluded as  
27  
28 230 unavailable. If retrieved citations are found to be abstract-only, they will be excluded, but we  
29  
30 231 will search for any subsequent peer-reviewed journal publications not already captured by our  
31  
32 232 search. The agreement of two reviewers will be required for inclusion of the full-text study in the  
33  
34 233 systematic review, with conflicts resolved by a third reviewer experienced with this review  
35  
36 234 process. Reasons for full-text exclusion will be recorded (Table 3).  
37  
38  
39  
40  
41  
42  
43

#### 44 236 *Data Extraction*

45  
46 237 Individual reviewers will extract data from selected articles using Excel (Microsoft ©, Redmond,  
47  
48 238 Washington, U.S.A.). The data sheet underwent multiple iterations, informed by pilot testing on  
49  
50 239 selected articles and group discussion. A review group member will review each cluster of data  
51  
52 240 entry for consistency of data extraction.  
53  
54  
55  
56  
57  
58  
59  
60

1  
2  
3 241 We will extract data on the study design, LLMIC country or countries involved, article  
4  
5 242 identifiers, location(s) within the healthcare system that critical care service(s) were delivered,  
6  
7 243 healthcare provider(s) providing the service(s), the critical care service(s) provided, critical  
8  
9 244 illnesses addressed, sample size, and the age range of the study population. Given the clinical  
10  
11 245 heterogeneity of patient populations and interventions, we will not extract data on patient  
12  
13 246 outcomes or the number of critical care beds in a given study facility.  
14  
15 247 Critical care services will be identified using international professional society definitions and  
16  
17 248 the scope of critical care functions in the WHO ECSF. Services will be subsequently classified  
18  
19 249 based on the categories in the WHO UHC Compendium [20]. We will use the top level  
20  
21 250 architecture of the compendium to categorise services broadly into foundations of care,  
22  
23 251 reproductive and sexual health, nutrition, end-of-life and palliative care issues, violence and  
24  
25 252 injury, non-communicable diseases (including diseases of the cardiovascular, respiratory,  
26  
27 253 neurologic, endocrine/metabolic, immunologic, digestive, haematologic, genitourinary, and other  
28  
29 254 systems) and communicable diseases.  
30  
31  
32  
33  
34

35 255

### 36 37 256 *Limitations*

38  
39 257 A potential overall source of bias in this review is the large number of reviewers involved in  
40  
41 258 article selection, such that the threshold for inclusion of studies in the review may vary by  
42  
43 259 reviewer pair and may lead to an underestimation of the locations or types of critical care  
44  
45 260 services delivered. We have attempted to mitigate this bias by extensive training of reviewers as  
46  
47 261 described above.  
48  
49

50  
51 262 Our study does not include publications on critical care delivery during the COVID-19  
52  
53 263 pandemic, and characteristics of care delivery may have changed over that time.  
54  
55  
56  
57  
58  
59

1  
2  
3 2644  
5 265 *Risk of Bias*

6  
7  
8 266 Given the broad scope of the review, anticipated heterogeneous studies (regarding design,  
9  
10 267 population, methods, and outcomes), and lack of planned meta-analyses to calculate summary  
11  
12 268 effects of associations between exposures and outcomes, we will not assess the risk of bias  
13  
14 269 (ROB) of individual studies. ROB of included studies is crucial to assess when conducting a  
15  
16 270 systematic review of therapeutic outcomes, diagnosis, natural history, prognosis, or clinical  
17  
18 271 prediction. However, for this study, we aim to describe the location of critical care delivery and  
19  
20 272 the specific services and interventions delivered. Although a complete sample of published  
21  
22 273 literature within our timeframe of interest is crucial, we believe that assessing the risk of bias of  
23  
24 274 each included study is not relevant to our intended review objectives.  
25  
26  
27

28 275

29  
30  
31 276 *Data analysis*

32  
33 277 We will calculate summary descriptive statistics, using counts and proportions for categorical  
34  
35 278 data and means (SD) or median (Q1, Q3) for continuous data. We will describe the number of  
36  
37 279 publications by year, types of services delivered, health care provider type, location of service  
38  
39 280 delivery, study population age-group, and critical illness category (based on the WHO UHC  
40  
41 281 Compendium), stratified by World Bank income class and WHO region. Due to the descriptive  
42  
43 282 nature of the study question and expected heterogeneity of patients and interventions, no meta-  
44  
45 283 analyses of effects on patient outcomes are planned. We anticipate that narrative synthesis may  
46  
47 284 be required to summarise our study results. We will conduct a sensitivity analysis to separately  
48  
49 285 consider studies that report only on adults and studies only on children.  
50  
51  
52  
53  
54  
55  
56  
57  
58  
59  
60

1  
2  
3 286 Subsequent ancillary reviews based on this dataset of studies may investigate specific age-group  
4  
5 287 populations, continents/regions, World Bank classes, critical care intervention clusters, disease  
6  
7 288 groups, locations, or healthcare professionals involved.  
8  
9

10 289

## 11 12 290 **Ethics & Dissemination**

13  
14 291 The study protocol was reviewed and exempted by the Stanford University Office for Human  
15  
16 292 Subjects Research and IRB on May 20, 2020. The results of this review will be disseminated  
17  
18 293 through scholarly publication and presentation at regional and international conferences. This  
19  
20 294 review is designed to inform broader WHO, IFEM and partner efforts to strengthen critical care  
21  
22 295 globally.  
23  
24

25  
26 296 We anticipate that the results of this comprehensive review will describe the current scope of  
27  
28 297 critical care services, providers, and location of service delivery in LLMICs, and will provide a  
29  
30 298 database of pertinent literature for future studies. The results of the review will be instrumental  
31  
32 299 for planners and policy makers in developing critical care service infrastructure, funding  
33  
34 300 priorities, and capacity-building interventions, and will highlight gaps in current knowledge of  
35  
36 301 critical care service delivery in LLMICs.  
37  
38

39 302

40 303

### 41 304 *Patient and Public Involvement*

42  
43 305 No patients were involved in this study.  
44  
45  
46  
47

48 306

49 307

50 308

51 309

52

53

54

55

56

57

58

59

60

310 Tables

311

312

**Table 1: List of World Bank Low to Lower-middle income countries - July 2016**

| Country                  | Region                     | World Bank Class    |
|--------------------------|----------------------------|---------------------|
| Afghanistan              | South Asia                 | Low income          |
| Armenia                  | Europe & Central Asia      | Lower middle income |
| Bangladesh               | South Asia                 | Lower middle income |
| Benin                    | Sub-Saharan Africa         | Low income          |
| Bhutan                   | South Asia                 | Lower middle income |
| Bolivia                  | Latin America & Caribbean  | Lower middle income |
| Burkina Faso             | Sub-Saharan Africa         | Low income          |
| Burundi                  | Sub-Saharan Africa         | Low income          |
| Cabo Verde               | Sub-Saharan Africa         | Lower middle income |
| Cambodia                 | East Asia & Pacific        | Lower middle income |
| Cameroon                 | Sub-Saharan Africa         | Lower middle income |
| Central African Republic | Sub-Saharan Africa         | Low income          |
| Chad                     | Sub-Saharan Africa         | Low income          |
| Comoros                  | Sub-Saharan Africa         | Low income          |
| Congo, Dem. Rep.         | Sub-Saharan Africa         | Low income          |
| Congo, Rep.              | Sub-Saharan Africa         | Lower middle income |
| Côte d'Ivoire            | Sub-Saharan Africa         | Lower middle income |
| Djibouti                 | Middle East & North Africa | Lower middle income |
| Egypt, Arab Rep.         | Middle East & North Africa | Lower middle income |
| El Salvador              | Latin America & Caribbean  | Lower middle income |
| Eritrea                  | Sub-Saharan Africa         | Low income          |
| Ethiopia                 | Sub-Saharan Africa         | Low income          |
| Gambia, The              | Sub-Saharan Africa         | Low income          |
| Ghana                    | Sub-Saharan Africa         | Lower middle income |
| Guatemala                | Latin America & Caribbean  | Lower middle income |
| Guinea                   | Sub-Saharan Africa         | Low income          |
| Guinea-Bissau            | Sub-Saharan Africa         | Low income          |
| Haiti                    | Latin America & Caribbean  | Low income          |
| Honduras                 | Latin America & Caribbean  | Lower middle income |
| India                    | South Asia                 | Lower middle income |

|    |                           |                            |                     |
|----|---------------------------|----------------------------|---------------------|
| 1  |                           |                            |                     |
| 2  |                           |                            |                     |
| 3  |                           |                            |                     |
| 4  | Indonesia                 | East Asia & Pacific        | Lower middle income |
| 5  | Kenya                     | Sub-Saharan Africa         | Lower middle income |
| 6  |                           |                            |                     |
| 7  | Kiribati                  | East Asia & Pacific        | Lower middle income |
| 8  |                           |                            |                     |
| 9  | Korea, Dem. People's Rep. | East Asia & Pacific        | Low income          |
| 10 | Kosovo                    | Europe & Central Asia      | Lower middle income |
| 11 |                           |                            |                     |
| 12 | Kyrgyz Republic           | Europe & Central Asia      | Lower middle income |
| 13 |                           |                            |                     |
| 14 | Lao PDR                   | East Asia & Pacific        | Lower middle income |
| 15 | Lesotho                   | Sub-Saharan Africa         | Lower middle income |
| 16 |                           |                            |                     |
| 17 | Liberia                   | Sub-Saharan Africa         | Low income          |
| 18 |                           |                            |                     |
| 19 | Madagascar                | Sub-Saharan Africa         | Low income          |
| 20 | Malawi                    | Sub-Saharan Africa         | Low income          |
| 21 |                           |                            |                     |
| 22 | Mali                      | Sub-Saharan Africa         | Low income          |
| 23 |                           |                            |                     |
| 24 | Mauritania                | Sub-Saharan Africa         | Lower middle income |
| 25 | Micronesia, Fed. Sts.     | East Asia & Pacific        | Lower middle income |
| 26 |                           |                            |                     |
| 27 | Moldova                   | Europe & Central Asia      | Lower middle income |
| 28 | Mongolia                  | East Asia & Pacific        | Lower middle income |
| 29 |                           |                            |                     |
| 30 | Morocco                   | Middle East & North Africa | Lower middle income |
| 31 | Mozambique                | Sub-Saharan Africa         | Low income          |
| 32 |                           |                            |                     |
| 33 | Myanmar                   | East Asia & Pacific        | Lower middle income |
| 34 |                           |                            |                     |
| 35 | Nepal                     | South Asia                 | Low income          |
| 36 | Nicaragua                 | Latin America & Caribbean  | Lower middle income |
| 37 |                           |                            |                     |
| 38 | Niger                     | Sub-Saharan Africa         | Low income          |
| 39 |                           |                            |                     |
| 40 | Nigeria                   | Sub-Saharan Africa         | Lower middle income |
| 41 | Pakistan                  | South Asia                 | Lower middle income |
| 42 |                           |                            |                     |
| 43 | Papua New Guinea          | East Asia & Pacific        | Lower middle income |
| 44 | Philippines               | East Asia & Pacific        | Lower middle income |
| 45 |                           |                            |                     |
| 46 | Rwanda                    | Sub-Saharan Africa         | Low income          |
| 47 |                           |                            |                     |
| 48 | Samoa                     | East Asia & Pacific        | Lower middle income |
| 49 | São Tomé and Príncipe     | Sub-Saharan Africa         | Lower middle income |
| 50 |                           |                            |                     |
| 51 | Senegal                   | Sub-Saharan Africa         | Low income          |
| 52 |                           |                            |                     |
| 53 | Sierra Leone              | Sub-Saharan Africa         | Low income          |
| 54 | Solomon Islands           | East Asia & Pacific        | Lower middle income |
| 55 |                           |                            |                     |
| 56 | Somalia                   | Sub-Saharan Africa         | Low income          |
| 57 |                           |                            |                     |
| 58 |                           |                            |                     |
| 59 |                           |                            |                     |
| 60 |                           |                            |                     |



|                      |                            |                     |
|----------------------|----------------------------|---------------------|
| South Sudan          | Sub-Saharan Africa         | Low income          |
| Sri Lanka            | South Asia                 | Lower middle income |
| Sudan                | Sub-Saharan Africa         | Lower middle income |
| Swaziland            | Sub-Saharan Africa         | Lower middle income |
| Syrian Arab Republic | Middle East & North Africa | Lower middle income |
| Tajikistan           | Europe & Central Asia      | Lower middle income |
| Tanzania             | Sub-Saharan Africa         | Low income          |
| Timor-Leste          | East Asia & Pacific        | Lower middle income |
| Togo                 | Sub-Saharan Africa         | Low income          |
| Tonga                | East Asia & Pacific        | Lower middle income |
| Tunisia              | Middle East & North Africa | Lower middle income |
| Uganda               | Sub-Saharan Africa         | Low income          |
| Ukraine              | Europe & Central Asia      | Lower middle income |
| Uzbekistan           | Europe & Central Asia      | Lower middle income |
| Vanuatu              | East Asia & Pacific        | Lower middle income |
| Vietnam              | East Asia & Pacific        | Lower middle income |
| West Bank and Gaza   | Middle East & North Africa | Lower middle income |
| Yemen, Rep.          | Middle East & North Africa | Lower middle income |
| Zambia               | Sub-Saharan Africa         | Lower middle income |
| Zimbabwe             | Sub-Saharan Africa         | Low income          |

313  
314  
315

316

| <b>Table 2: Critical Care Service Delivery/ Interventions List</b>                                                                                              |
|-----------------------------------------------------------------------------------------------------------------------------------------------------------------|
| <i>Monitoring/nursing</i>                                                                                                                                       |
| Frequent monitoring/ surveillance and recording of clinical parameters [vital signs, pulse oximetry, capnography, etc.]                                         |
| Acuity-based triage / performance of focused assessment for the critically ill [including shock, altered mental status, respiratory distress, polytrauma, etc.] |
| Critical care nursing services [including implementation of higher than floor/ward-level care or nurse:patient ratio]                                           |
| Frequent monitoring/ surveillance of fetus [fetal heart monitoring, tocometry, etc.]                                                                            |
|                                                                                                                                                                 |
| <i>Interventions for haemodynamic instability/ organ dysfunction</i>                                                                                            |
| Support of haemodynamic instability and management of acute life threatening organ dysfunction                                                                  |
| Titration of advanced parenteral therapeutics                                                                                                                   |
| Intravenous fluid resuscitation                                                                                                                                 |
| Blood products transfusion                                                                                                                                      |
| Administration of advanced blood replacement therapies [e.g. plasmapheresis]                                                                                    |
| Massive haemorrhage control [including tourniquet application, haemostatic agents, pelvic binding]                                                              |
| Targeted temperature management and hyperthermia / hypothermia management                                                                                       |
| Vasopressor/ inotrope administration                                                                                                                            |
| Anti-arrhythmic medication administration for the critically ill                                                                                                |
| Cardio-pulmonary resuscitation, basic only [chest compressions in the absence of invasive procedures]                                                           |
| Advanced cardiac life-support resuscitation [include emergent pacing, defibrillation, cardioversion]                                                            |
| Spinal immobilisation                                                                                                                                           |
| Extracorporeal membrane oxygenation (ECMO) / extracorporeal life support (ECLS)                                                                                 |
| Advanced trauma resuscitation / Advanced Trauma Life Support® (ATLS®) / WHO Trauma Care Checklist use                                                           |
|                                                                                                                                                                 |
| <i>Respiratory interventions</i>                                                                                                                                |
| Support of respiratory insufficiency/ failure                                                                                                                   |
| Oxygen delivery, simple [face mask, nasal prongs]                                                                                                               |
| Oxygen delivery, high flow [> 15 L/min]                                                                                                                         |
| Mechanical ventilation, non-invasive [including continuous positive airway pressure (CPAP)]                                                                     |
| Mechanical ventilation, invasive                                                                                                                                |
| Non-invasive airway management [basic airway opening maneuvers, bag mask ventilation, oro- or naso-pharyngeal airway placement, etc.]                           |

|    |                                                                                                                        |
|----|------------------------------------------------------------------------------------------------------------------------|
| 1  |                                                                                                                        |
| 2  |                                                                                                                        |
| 3  | Advanced invasive airway management, non-surgical [tracheal intubation, laryngeal mask airway placement,               |
| 4  | bougie, airway exchange catheters, etc.]                                                                               |
| 5  | Advanced surgical airway management [tracheostomy, cricothyrotomy performed outside the operating                      |
| 6  | room/theatre]                                                                                                          |
| 7  |                                                                                                                        |
| 8  |                                                                                                                        |
| 9  |                                                                                                                        |
| 10 | <i>Other invasive procedures</i>                                                                                       |
| 11 | Peripheral venous cannulation for the critically ill                                                                   |
| 12 |                                                                                                                        |
| 13 | Advanced vascular access [arterial lines, central venous / pulmonary artery catheters, intra-osseous access]           |
| 14 | Thoracic invasive procedures for the critically ill [thoracostomy, pleural drain placement, thoracentesis,             |
| 15 | pericardiocentesis, emergent thoracotomy performed outside of the operating room/theatre]                              |
| 16 |                                                                                                                        |
| 17 |                                                                                                                        |
| 18 | <i>Additional targeted therapies</i>                                                                                   |
| 19 |                                                                                                                        |
| 20 | Early antibiotic administration for the critically ill                                                                 |
| 21 |                                                                                                                        |
| 22 | Treatment of severe infections/ inflammation / sepsis [steroids and other adjuncts]                                    |
| 23 |                                                                                                                        |
| 24 | Renal replacement therapy / haemodialysis or peritoneal dialysis                                                       |
| 25 |                                                                                                                        |
| 26 | Monitoring and treatment of critical electrolyte/ metabolic/ acid base derangements                                    |
| 27 |                                                                                                                        |
| 28 | Nutrition management for the critically ill / injured                                                                  |
| 29 |                                                                                                                        |
| 30 | Provision of prophylaxis associated with critical illness [including alimentary, venous thromboembolism]               |
| 31 |                                                                                                                        |
| 32 | Advanced burn care for the critically ill                                                                              |
| 33 |                                                                                                                        |
| 34 | Emergent poisoning detoxification/ antidote                                                                            |
| 35 |                                                                                                                        |
| 36 | Acute reperfusion therapy: medical or interventional [cardiac/coronary arteries]                                       |
| 37 |                                                                                                                        |
| 38 | Acute reperfusion therapy: medical or interventional [pulmonary embolism, or other acute thromboembolism]              |
| 39 |                                                                                                                        |
| 40 |                                                                                                                        |
| 41 | <i>Neurological interventions</i>                                                                                      |
| 42 |                                                                                                                        |
| 43 | Acute medical stabilisation of critical neurologic illness / provision of neuroprotection for the critically ill [e.g. |
| 44 | seizure management]                                                                                                    |
| 45 |                                                                                                                        |
| 46 | Acute surgical stabilisation of critical neurologic illness [e.g. emergent craniotomy, ventricular drain, intracranial |
| 47 | pressure monitor performed outside the operating room/theatre]                                                         |
| 48 |                                                                                                                        |
| 49 | Acute management of agitation/ delirium                                                                                |
| 50 |                                                                                                                        |
| 51 | Acute reperfusion therapy: medical or interventional [neurovascular procedures for cerebrovascular pathology such      |
| 52 | as stenting, coiling performed outside the operating room/theatre]                                                     |
| 53 |                                                                                                                        |
| 54 | Analgesia and sedation [sedative infusions, moderate / conscious sedation, up to general anaesthesia, performed        |
| 55 | outside the operating room/theatre]                                                                                    |
| 56 |                                                                                                                        |
| 57 |                                                                                                                        |
| 58 | <i>Obstetrical critical care services</i>                                                                              |
| 59 |                                                                                                                        |
| 60 | Obstetric critical care management [induction, tocolytic, high-risk labor, emergent/complex delivery, perimortem       |
|    | cesarean section performed outside the operating room/theatre]                                                         |

|    |                                                                                                                                                                                                                          |
|----|--------------------------------------------------------------------------------------------------------------------------------------------------------------------------------------------------------------------------|
| 1  |                                                                                                                                                                                                                          |
| 2  |                                                                                                                                                                                                                          |
| 3  |                                                                                                                                                                                                                          |
| 4  | <i>Diagnostic modalities</i>                                                                                                                                                                                             |
| 5  | Utilisation of targeted diagnostic strategy to establish timely aetiology for the critically ill                                                                                                                         |
| 6  |                                                                                                                                                                                                                          |
| 7  | Basic radiography                                                                                                                                                                                                        |
| 8  |                                                                                                                                                                                                                          |
| 9  | Computed tomography                                                                                                                                                                                                      |
| 10 |                                                                                                                                                                                                                          |
| 11 | Magnetic resonance imaging                                                                                                                                                                                               |
| 12 | Critical care ultrasound, including point-of-care trans-thoracic / trans-oesophageal echocardiography                                                                                                                    |
| 13 | Laboratory and other rapid results reporting including point-of-care diagnostics [arterial blood gas, glucometry, chemistry, haematology]                                                                                |
| 14 |                                                                                                                                                                                                                          |
| 15 | Microbiology and other infectious rapid results reporting                                                                                                                                                                |
| 16 |                                                                                                                                                                                                                          |
| 17 |                                                                                                                                                                                                                          |
| 18 |                                                                                                                                                                                                                          |
| 19 | <i>Multi-system processes related to critical care service delivery</i>                                                                                                                                                  |
| 20 | Prognosis-based advance care planning [critical care level hospice/palliative, goals of care discussions, plan for de-escalation of care and transition to post-critical care needs appropriate to context]              |
| 21 |                                                                                                                                                                                                                          |
| 22 | Coordination of specialist services for multisystem illness [managing communication between, and coordination of, various healthcare personnel caring for patient detailing diagnosis, treatment given, and disposition] |
| 23 |                                                                                                                                                                                                                          |
| 24 |                                                                                                                                                                                                                          |
| 25 | Critical care triage / care pathways systems / clinical illness severity and/or risk stratification                                                                                                                      |
| 26 |                                                                                                                                                                                                                          |
| 27 | Critical care level crisis management [surge response, disaster management, multiple casualty incident]                                                                                                                  |
| 28 |                                                                                                                                                                                                                          |
| 29 | Health information systems, medical records                                                                                                                                                                              |
| 30 |                                                                                                                                                                                                                          |
| 31 | <i>Other critical care services</i>                                                                                                                                                                                      |
| 32 |                                                                                                                                                                                                                          |
| 33 | Critical care pharmacy services                                                                                                                                                                                          |
| 34 |                                                                                                                                                                                                                          |
| 35 | Critical care education and capacity building [must have clinical service delivery component]                                                                                                                            |
| 36 |                                                                                                                                                                                                                          |
| 37 | Other critical care intervention/ service delivery                                                                                                                                                                       |

317

318

319

320

| <b>Table 3: Hierarchy of Exclusion for Full Text</b> |                                                                                                                            |
|------------------------------------------------------|----------------------------------------------------------------------------------------------------------------------------|
| <b>1</b>                                             | Not published from Jan 1 2008 - Jan 1 2020                                                                                 |
| <b>2</b>                                             | Is not a study on living humans, or is not related to health aspects of living humans (exclude animal or forensic studies) |
| <b>3</b>                                             | Does not address Low- or Low-middle income country (per World Bank Class 2016)                                             |
| <b>4</b>                                             | Does not address critical care service/interventions (per Table 2)                                                         |
| <b>5</b>                                             | Not Original Research, Systematic Review, or Brief Report                                                                  |
| <b>6</b>                                             | Does not describe where in healthcare setting critical care service/intervention is delivered                              |
| <b>7</b>                                             | Addresses exclusively peri-operative care that occurs in the operating room/theatre                                        |
| <b>8</b>                                             | Does not address care by healthcare professionals                                                                          |
| <b>9</b>                                             | Addresses care performed exclusively by or for High Income Country / High-Middle Income Country military personnel         |
| <b>10</b>                                            | Abstract-only, full text non-existent (for conference, poster/presentation, etc.)                                          |
| <b>11</b>                                            | Full text not available in English                                                                                         |
| <b>12</b>                                            | Full text not available online                                                                                             |

321  
322

1  
2  
3 323 Authors' Contributions:

4 324 AL is the guarantor, drafted, prepared, and submitted the manuscript, contributed to the  
5 325 development of the selection criteria, methodology, data extraction criteria and forms, developed  
6 326 and executed the search strategy, provided teaching and guidance of review process to review  
7 327 group.  
8 328

9 329 NA, SM, SK, LL, ED, BC, NB, AB, MJ, PDS and TR provided comments and critical revisions  
10 330 to the manuscript, made substantial contributions to the conception and design of the review  
11 331 methodology and planned analysis.  
12 332

13 333 ED, SK, PAS, MY, BC, PDS, MJ, RL, AR, CC, NB, NH, NS, PM, BV, NS, AB, CM, AGR, EB,  
14 334 AF, SY made key contributions to the conception, design and execution of eligibility criteria and  
15 335 methodology, participated in the acquisition and interpretation of reference data for screening  
16 336 phases, provided feedback on full text data extraction forms, and provided critical edits to the  
17 337 intellectual content of the manuscript.  
18 338

19 339 All authors read, provided feedback and approved the final manuscript, and agree to be  
20 340 accountable for all aspects of the work in ensuring that questions related to the accuracy or  
21 341 integrity of any part of the work are appropriately investigated and resolved. Thus, all authors  
22 342 have met the four ICMJE criteria recommended for authorship.  
23 343

24 344 Funding Statement:

25 345 This research received no specific grant from any funding agency in the public, commercial or  
26 346 not-for-profit sectors.  
27 347

28 348 Competing Interests Statement:

29 349 There are no competing interests to declare for this research.  
30 350

31 351 Word Count:

32 352 3975 (includes abstract)  
33 353  
34 354  
35 355  
36  
37  
38  
39  
40  
41  
42  
43  
44  
45  
46  
47  
48  
49  
50  
51  
52  
53  
54  
55  
56  
57  
58  
59  
60

1  
2  
3 356 **References**  
4 357

- 5  
6 358 [1] Reynolds T, Sawe H, Rubiano A, *et al.* *Strengthening Health Systems to Provide Emergency*  
7  
8 359 *Care. Disease Control Priorities: Improving Health and Reducing Poverty.* 3rd edition; 9(13).  
9  
10 360 Washington, DC. The International Bank for Reconstruction and Development/The World Bank;  
11 361 2017. <https://www.ncbi.nlm.nih.gov/books/NBK525279/> (accessed 10 June 2020).  
12  
13 362 [2] Marshall JC, Bosco L, Adhikari NK, *et al.* What is an intensive care unit? A report of the task  
14  
15 363 force of the World Federation of Societies of Intensive and Critical Care Medicine. *J Crit*  
16 364 *Care* 2017;37:270-276.  
17  
18 365 [3] Herbert LJ, Wilson IJ. Pulse oximetry in low-resource settings. *Breathe* 2012;9:90-98.  
19  
20 366 [4] Cameron PA, Gabbe BJ, Smith K, *et al.* Triage the right patient to the right place in the  
21  
22 367 shortest time. *Br J Anaesth* 2014;113(2):226-233.  
23  
24 368 [5] Diaz JV, Riviello ED, Papali A, *et al.* Global Critical Care: Moving Forward in Resource-  
25 369 Limited Settings. *Ann Glob Health* 2019;85(1).  
26  
27 370 [6] Murthy S, Adhikari NK. Global Health Care of the Critically Ill in Low-Resource Settings.  
28 371 *Ann Am Thorac Soc* 2013;10(5):509-513.  
29  
30 372 [7] Mathers C, Fat DM, Boerma JT. *World Health Organization. The global burden of disease:*  
31 373 *2004 update.* Geneva, Switzerland. World Health Organization; 2008.  
32  
33 374 [8] Rudd KE, Johnson SC, Agesa KM, *et al.* Global, regional, and national sepsis incidence and  
34 375 mortality, 1990-2017: analysis for the Global Burden of Disease Study. *Lancet*  
35 376 2020;395(10219):200-211.  
36  
37 377 [9] Schultz MJ, Dunser MW, Dondorp AM, *et al.* Current challenges in the management of  
38 378 sepsis in ICUs in resource-poor settings and suggestions for the future. *Intensive Care Med*  
39 379 2017;34:612-624.  
40  
41 380 [10] Murthy S, Leligdowicz A, Adhikari N. Intensive Care Unit Capacity in Low-Income  
42 381 Countries: A Systematic Review. *PLoS One* 2015;10(1).  
43  
44 382 [11] Murthy S, Adhikari NK. Global health care of the critically ill in low-resource settings. *Ann*  
45 383 *Am Thorac Soc* 2013;10(5):509-513.  
46  
47 384 [12] Duke T, Graham SM, Cherian MN, *et al.* Oxygen is an essential medicine: a call for  
48 385 international action. *Int J Tuberc Lung Dis* 2010;14(11):1362-1368.  
49  
50  
51  
52  
53  
54  
55  
56  
57  
58  
59  
60

- 1  
2  
3 386 [13] Hansmann A, Morrow BM, Lang H. Review of supplemental oxygen and respiratory  
4 387 support for paediatric emergency care in sub-Saharan Africa. *Afr J Emerg Med* 2017;7:10-19.  
5  
6 388 [14] Thaddeus S, Maine D. Too far to walk: maternal mortality in context. *Soc Sci Med*  
7  
8 389 1994;38:1091-1100.  
9  
10 390 [15] Cavallaro FL, Marchan TJ. Responsiveness of emergency obstetric care systems in low- and  
11 391 middle-income countries: a critical review of the “third delay”. *Acta obstetrica et gynecologica*  
12 392 *Scandinavica* 2018;92(5):496-507.  
13  
14 393 [16] Shanahan T, Risko N, Razzak J, *et al.* Aligning emergency care with global health priorities.  
15 394 *Int J Emerg* 2018;11(1):1-4.  
16  
17 395 [17] Mehmood A, Razzak JA, Kabir S. Development and pilot implementation of a locally  
18 396 developed Trauma Registry: lessons learnt in a low-income country. *BMC Emergency Medicine*  
19 397 2013;13(4).  
20  
21 398 [18] Reynold TA, Stewart B, Drewett I, *et al.* The Impact of Trauma Care Systems in Low- and  
22 399 Middle-Income Countries. *Annu Rev Public Health* 2017;38:507-532.  
23  
24 400 [19] World Health Organization. *WHO Emergency Care Systems Framework*.  
25 401 <https://www.who.int/publications/i/item/who-emergency-care-system-framework>  
26  
27 402 [20] World Health Organization. *WHO Universal Health Coverage Compendium*.  
28 403 <https://www.who.int/universal-health-coverage/compendium>  
29  
30  
31  
32  
33  
34 404  
35  
36 405  
37  
38 406  
39  
40  
41  
42  
43  
44  
45  
46  
47  
48  
49  
50  
51  
52  
53  
54  
55  
56  
57  
58  
59  
60



## Appendix 1: Example search strategy: Pubmed/Medline

(((("Critical Care"[Mesh] OR "critical care"[tw] OR "Critical Illness"[Mesh] OR "Critical Illness"[tw] OR "Critical Care Nursing"[Mesh] OR "Critical Care Outcomes"[Mesh] OR "intensive care"[tw] OR "Intensive Care Units"[Mesh] OR "intermediate care unit"[tw] OR "step down unit"[tw] OR "Shock"[Mesh] OR "Cardiac Arrest"[tw] OR "heart arrest"[MeSH] OR "Respiratory Arrest"[tw] OR "Emergency Medicine"[Mesh] OR "Evidence-Based Emergency Medicine"[Mesh] OR "Emergency Nursing"[Mesh] OR "Emergency Treatment"[mh:noexp] OR "Advanced Trauma Life Support Care"[mesh] OR "Resuscitation"[mesh] OR "cardiopulmonary resuscitation"[tw] OR "Cardiopulmonary Resuscitation"[mesh] OR "Heart Massage"[mesh] OR "Respiration, Artificial"[mesh] OR ventilator\*[ti] OR icu[ti] OR picu[ti] OR nicu[ti] OR cu[ti] OR cpr[ti] OR "ambulances"[Mesh] OR "Emergency Service, Hospital"[mesh] OR "Poison Control Centers"[mesh] OR "Triage"[mh:noexp] OR "Hospital Rapid Response Team"[Mesh])) AND (((("Developing Countries"[Mesh] OR "Medically Underserved Area"[Mesh] OR "developing country"[tw] OR "developing countries"[tw] OR "developing nation"[tw] OR "developing nations"[tw] OR "developing population"[tw] OR "developing populations"[tw] OR "developing world"[tw] OR "less developed country"[tw] OR "less developed countries"[tw] OR "less developed nation"[tw] OR "less developed nations"[tw] OR "less developed population"[tw] OR "less developed populations"[tw] OR "less developed world"[tw] OR "lesser developed country"[tw] OR "lesser developed countries"[tw] OR "lesser developed nation"[tw] OR "lesser developed nations"[tw] OR "lesser developed population"[tw] OR "lesser developed populations"[tw] OR "lesser developed world"[tw] OR "under developed country"[tw] OR "under developed countries"[tw] OR "under developed nation"[tw] OR "under developed nations"[tw] OR "under developed population"[tw] OR "under developed populations"[tw] OR "under developed world"[tw] OR "underdeveloped country"[tw] OR "underdeveloped countries"[tw] OR "underdeveloped nation"[tw] OR "underdeveloped nations"[tw] OR "underdeveloped population"[tw] OR "underdeveloped populations"[tw] OR "underdeveloped world"[tw] OR "middle income country"[tw] OR "middle income countries"[tw] OR "middle income nation"[tw] OR "middle income nations"[tw] OR "middle income population"[tw] OR "middle income populations"[tw] OR "low income country"[tw] OR "low income countries"[tw] OR "low income nation"[tw] OR "low income nations"[tw] OR "low income population"[tw] OR "low income populations"[tw] OR "lower income country"[tw] OR "lower income countries"[tw] OR "lower income nation"[tw] OR "lower income nations"[tw] OR "lower income population"[tw] OR "lower income populations"[tw] OR "underserved country"[tw] OR "underserved countries"[tw] OR "underserved nation"[tw] OR "underserved nations"[tw] OR "underserved population"[tw] OR "underserved populations"[tw] OR "underserved world"[tw] OR "under served country"[tw] OR "under served countries"[tw] OR "under served nation"[tw] OR "under served nations"[tw] OR "under served population"[tw] OR "under served populations"[tw] OR "under served world"[tw] OR "deprived country"[tw] OR "deprived countries"[tw] OR "deprived nation"[tw] OR "deprived nations"[tw] OR "deprived population"[tw] OR "deprived populations"[tw] OR "deprived world"[tw] OR "poor country"[tw] OR "poor countries"[tw] OR "poor nation"[tw] OR "poor nations"[tw] OR "poor population"[tw] OR "poor populations"[tw] OR "poor world"[tw] OR "poorer country"[tw] OR "poorer countries"[tw] OR "poorer nation"[tw] OR "poorer nations"[tw] OR "poorer population"[tw] OR "poorer populations"[tw] OR "poorer world"[tw] OR "developing economy"[tw] OR "developing economies"[tw] OR "less developed economy"[tw] OR "less developed economies"[tw] OR "lesser developed economy"[tw] OR "lesser developed economies"[tw] OR "under developed economy"[tw] OR "under developed economies"[tw] OR "underdeveloped economy"[tw] OR "underdeveloped economies"[tw] OR "middle income economy"[tw] OR "middle income economies"[tw] OR "low income economy"[tw] OR "low income economies"[tw] OR "lower income economy"[tw] OR "lower income economies"[tw] OR "low gdp"[tw] OR "low gnp"[tw] OR "low gross domestic"[tw] OR "low gross national"[tw] OR "lower gdp"[tw] OR "lower gnp"[tw] OR "lower gross domestic"[tw] OR "lower gross national"[tw] OR "lami country"[tw] OR "lami countries"[tw] OR "transitional country"[tw] OR "transitional countries"[tw])) OR (Afghanistan[tw] OR "guatemala" [tw] OR "samoa" [tw] OR tonga OR "cape verde" [tw] OR Armenia [tw] OR Bangladesh[tw] OR Benin[tw] OR Bhutan[tw] OR Bolivia[tw] OR "Burkina Faso"[tw] OR Burundi[tw] OR "Cabo Verde"[tw] OR Cambodia[tw] OR Cameroon[tw] OR "Central African Republic"[tw] OR Chad[tw] OR Comoros[tw] OR Congo[tw] OR "Cote d'Ivoire"[tw] OR Djibouti[tw] OR Egypt[tw] OR "El Salvador"[tw] OR Eritrea[tw] OR Ethiopia[tw] OR Gambia[tw] OR Ghana[tw] OR Guinea[tw] OR "Guinea-Bissau"[tw] OR Haiti[tw] OR Honduras[tw] OR India[tw] OR Indonesia[tw] OR Kenya[tw] OR Kiribati[tw] OR "Democratic

1  
2  
3 People's Republic of Korea"[tw] OR "north korea"[tw] OR Kosovo[tw] OR Kyrgyzstan[tw] OR laos[tw] OR  
4 Lesotho[tw] OR Liberia[tw] OR Madagascar[tw] OR Malawi[tw] OR Mali[tw] OR Mauritania[tw] OR  
5 Micronesia[tw] OR Moldova[tw] OR Mongolia[tw] OR Morocco[tw] OR Mozambique[tw] OR Myanmar[tw] OR  
6 Nepal[tw] OR Nicaragua[tw] OR Niger[tw] OR Nigeria[tw] OR Pakistan[tw] OR "Papua New Guinea"[tw] OR  
7 Philippines[tw] OR Rwanda[tw] OR "Sao Tome"[tw] OR Principe[tw] OR Senegal[tw] OR "Sierra Leone"[tw]  
8 OR "Solomon Islands"[tw] OR Somalia[tw] OR "South Sudan"[tw] OR "Sri Lanka"[tw] OR Sudan[tw] OR  
9 Swaziland[tw] OR syria[tw] OR Tajikistan[tw] OR Tanzania[tw] OR "Timor-Leste"[tw] OR Togo[tw] OR  
10 Tunisia[tw] OR Uganda[tw] OR Ukraine[tw] OR Uzbekistan[tw] OR Vanuatu[tw] OR Vietnam[tw] OR "West  
11 Bank"[tw] OR Yemen[tw] OR Zambia[tw] OR Zimbabwe[tw] OR Kyrgyz[tw] OR Syrian[tw] OR "lao pdr"[tw]  
12 OR Burma[tw] OR gaza[tw] OR "ivory coast"[tw] OR Afghanistan[mesh] OR "guatemala" [mesh] OR "samoa"  
13 [mesh] OR tonga OR "cape verde" [mesh] OR Armenia [mesh] OR Bangladesh[mesh] OR Benin[mesh] OR  
14 Bhutan[mesh] OR Bolivia[mesh] OR "Burkina Faso"[mesh] OR Burundi[mesh] OR "Cabo Verde"[mesh] OR  
15 Cambodia[mesh] OR Cameroon[mesh] OR "Central African Republic"[mesh] OR Chad[mesh] OR  
16 Comoros[mesh] OR Congo[mesh] OR "Cote d'Ivoire"[mesh] OR Djibouti[mesh] OR Egypt[mesh] OR "El  
17 Salvador"[mesh] OR Eritrea[mesh] OR Ethiopia[mesh] OR Gambia[mesh] OR Ghana[mesh] OR Guinea[mesh]  
18 OR "Guinea-Bissau"[mesh] OR Haiti[mesh] OR Honduras[mesh] OR India[mesh] OR Indonesia[mesh] OR  
19 Kenya[mesh] OR Kiribati[mesh] OR "Democratic People's Republic of Korea"[mesh] OR Kosovo[mesh] OR  
20 Kyrgyzstan[mesh] OR laos[mesh] OR Lesotho[mesh] OR Liberia[mesh] OR Madagascar[mesh] OR  
21 Malawi[mesh] OR Mali[mesh] OR Mauritania[mesh] OR Micronesia[mesh] OR Moldova[mesh] OR  
22 Mongolia[mesh] OR Morocco[mesh] OR Mozambique[mesh] OR Myanmar[mesh] OR Nepal[mesh] OR  
23 Nicaragua[mesh] OR Niger[mesh] OR Nigeria[mesh] OR Pakistan[mesh] OR "Papua New Guinea"[mesh] OR  
24 Philippines[mesh] OR Rwanda[mesh] OR "Sao Tome and Principe"[mesh] OR Senegal[mesh] OR "Sierra  
25 Leone"[mesh] OR "melanesia"[mesh] OR Somalia[mesh] OR "South Sudan"[mesh] OR "Sri Lanka"[mesh] OR  
26 Sudan[mesh] OR Swaziland[mesh] OR syria[mesh] OR Tajikistan[mesh] OR Tanzania[mesh] OR "Timor-  
27 Leste"[mesh] OR Togo[mesh] OR Tunisia[mesh] OR Uganda[mesh] OR Ukraine[mesh] OR Uzbekistan[mesh]  
28 OR Vanuatu[mesh] OR Vietnam[mesh] OR Yemen[mesh] OR Zambia[mesh] OR Zimbabwe[mesh])) NOT  
29 ("Emergency Services, Psychiatric"[Mesh] OR "Addresses"[pt] OR "Autobiography"[pt] OR "Bibliography"[pt]  
30 OR "Biography"[pt] OR "Case Reports"[pt] OR "Comment"[pt] OR "Congresses"[pt] OR "Consensus  
31 Development Conference"[pt] OR "Consensus Development Conference, NIH"[pt] OR "Dictionary"[pt] OR  
32 "Directory"[pt] OR "Editorial"[pt] OR "Electronic Supplementary Materials"[pt] OR "Festschrift"[pt] OR  
33 "Historical Article"[pt] OR "Interactive Tutorial"[pt] OR "Interview"[pt] OR "Lectures"[pt] OR "Legal  
34 Cases"[pt] OR "Legislation"[pt] OR "Letter"[pt] OR "News"[pt] OR "Newspaper Article"[pt] OR "Overall"[pt]  
35 OR "Patient Education Handout"[pt] OR "Periodical Index"[pt] OR "Personal Narratives"[pt] OR  
36 "Portraits"[pt] OR "Practice Guideline"[pt] OR "Published Erratum"[pt] OR "Retracted Publication"[pt] OR  
37 "Retraction of Publication"[pt] OR "Technical Report"[pt] OR "Video-Audio Media"[pt] OR "Webcasts"[pt] OR  
38 "case report"[ti] OR bystand\*[ti])) AND english[lang] NOT ("animals"[mesh] NOT "humans"[mesh]) AND  
39 ("2008/01/01"[PDAT] : "3000/12/31"[PDAT])  
40  
41  
42  
43  
44  
45  
46  
47  
48  
49  
50  
51  
52  
53  
54  
55  
56  
57  
58  
59  
60

**PRISMA-P (Preferred Reporting Items for Systematic review and Meta-Analysis Protocols) 2015 checklist: recommended items to address in a systematic review protocol\***

| Section and topic                 | Item No       | Checklist item                                                                                                                                                                                                                | Completed?                                                                          | (Page, Line) |
|-----------------------------------|---------------|-------------------------------------------------------------------------------------------------------------------------------------------------------------------------------------------------------------------------------|-------------------------------------------------------------------------------------|--------------|
| <b>ADMINISTRATIVE INFORMATION</b> |               |                                                                                                                                                                                                                               |                                                                                     |              |
| Title:                            |               |                                                                                                                                                                                                                               |                                                                                     |              |
| Identification                    | 1a            | Identify the report as a protocol of a systematic review                                                                                                                                                                      | X                                                                                   | 1, 1         |
|                                   | Update        | 1b                                                                                                                                                                                                                            | If the protocol is for an update of a previous systematic review, identify as such  | N/A          |
| Registration                      | 2             | If registered, provide the name of the registry (such as PROSPERO) and registration number                                                                                                                                    | X                                                                                   | 1, 6         |
| Authors:                          |               |                                                                                                                                                                                                                               |                                                                                     |              |
| Contact                           | 3a            | Provide name, institutional affiliation, e-mail address of all protocol authors; provide physical mailing address of corresponding author                                                                                     | X                                                                                   | 1, 10        |
|                                   | Contributions | 3b                                                                                                                                                                                                                            | Describe contributions of protocol authors and identify the guarantor of the review | X            |
| Amendments                        | 4             | If the protocol represents an amendment of a previously completed or published protocol, identify as such and list changes; otherwise, state plan for documenting important protocol amendments                               | N/A                                                                                 |              |
| Support:                          |               |                                                                                                                                                                                                                               |                                                                                     |              |
| Sources                           | 5a            | Indicate sources of financial or other support for the review                                                                                                                                                                 | X                                                                                   | 1, 75        |
| Sponsor                           | 5b            | Provide name for the review funder and/or sponsor                                                                                                                                                                             | X                                                                                   | 21, 407      |
| Role of sponsor or funder         | 5c            | Describe roles of funder(s), sponsor(s), and/or institution(s), if any, in developing the protocol                                                                                                                            | X                                                                                   | 1, 75        |
| <b>INTRODUCTION</b>               |               |                                                                                                                                                                                                                               |                                                                                     |              |
| Rationale                         | 6             | Describe the rationale for the review in the context of what is already known                                                                                                                                                 | X                                                                                   | 6, 150       |
| Objectives                        | 7             | Provide an explicit statement of the question(s) the review will address with reference to participants, interventions, comparators, and outcomes (PICO)                                                                      | X                                                                                   | 7, 175       |
| <b>METHODS</b>                    |               |                                                                                                                                                                                                                               |                                                                                     |              |
| Eligibility criteria              | 8             | Specify the study characteristics (such as PICO, study design, setting, time frame) and report characteristics (such as years considered, language, publication status) to be used as criteria for eligibility for the review | X                                                                                   | 7, 160       |
| Information sources               | 9             | Describe all intended information sources (such as electronic databases, contact with study authors, trial registers or other grey literature sources) with planned dates of coverage                                         | X                                                                                   | 9, 196       |
| Search strategy                   | 10            | Present draft of search strategy to be used for at least one electronic database, including planned limits, such that it could be repeated                                                                                    | X                                                                                   | appx. 1      |
| Study records:                    |               |                                                                                                                                                                                                                               |                                                                                     |              |
| Data management                   | 11a           | Describe the mechanism(s) that will be used to manage records and data throughout the review                                                                                                                                  | X                                                                                   | 9, 211       |

|                                    |     |                                                                                                                                                                                                                                                  |     |         |
|------------------------------------|-----|--------------------------------------------------------------------------------------------------------------------------------------------------------------------------------------------------------------------------------------------------|-----|---------|
| Selection process                  | 11b | State the process that will be used for selecting studies (such as two independent reviewers) through each phase of the review (that is, screening, eligibility and inclusion in meta-analysis)                                                  | X   | 9, 217  |
| Data collection process            | 11c | Describe planned method of extracting data from reports (such as piloting forms, done independently, in duplicate), any processes for obtaining and confirming data from investigators                                                           | X   | 10, 236 |
| Data items                         | 12  | List and define all variables for which data will be sought (such as PICO items, funding sources), any pre-planned data assumptions and simplifications                                                                                          | X   | 10, 241 |
| Outcomes and prioritization        | 13  | List and define all outcomes for which data will be sought, including prioritization of main and additional outcomes, with rationale                                                                                                             | X   | 11, 247 |
| Risk of bias in individual studies | 14  | Describe anticipated methods for assessing risk of bias of individual studies, including whether this will be done at the outcome or study level, or both; state how this information will be used in data synthesis                             | X   | 12, 265 |
| Data synthesis                     | 15a | Describe criteria under which study data will be quantitatively synthesized                                                                                                                                                                      | X   | 12, 276 |
|                                    | 15b | If data are appropriate for quantitative synthesis, describe planned summary measures, methods of handling data and methods of combining data from studies, including any planned exploration of consistency (such as $I^2$ , Kendall's $\tau$ ) | X   | 12, 276 |
|                                    | 15c | Describe any proposed additional analyses (such as sensitivity or subgroup analyses, meta-regression)                                                                                                                                            | X   | 12, 276 |
|                                    | 15d | If quantitative synthesis is not appropriate, describe the type of summary planned                                                                                                                                                               | X   | 12, 276 |
| Meta-bias(es)                      | 16  | Specify any planned assessment of meta-bias(es) (such as publication bias across studies, selective reporting within studies)                                                                                                                    | N/A |         |
| Confidence in cumulative evidence  | 17  | Describe how the strength of the body of evidence will be assessed (such as GRADE)                                                                                                                                                               | N/A |         |

**\* It is strongly recommended that this checklist be read in conjunction with the PRISMA-P Explanation and Elaboration (cite when available) for important clarification on the items. Amendments to a review protocol should be tracked and dated. The copyright for PRISMA-P (including checklist) is held by the PRISMA-P Group and is distributed under a Creative Commons Attribution Licence 4.0.**

*From: Shamseer L, Moher D, Clarke M, Ghersi D, Liberati A, Petticrew M, Shekelle P, Stewart L, PRISMA-P Group. Preferred reporting items for systematic review and meta-analysis protocols (PRISMA-P) 2015: elaboration and explanation. *BMJ*. 2015 Jan 2;349(jan02 1):g7647.*
