# Supplementary material for: Critical care service delivery across healthcare systems in low-income and low-middle-income countries: protocol for a systematic review
Source: PubMed Central journal article supplement — BMJ Open. 2021 Aug 30;11(8):e048423. doi: 10.1136/bmjopen-2020-048423 (PMC8407204; doi:10.1136/bmjopen-2020-048423), 2021-08-30
Supplement: bmjopen-2020-048423supp001.pdf [file bmjopen-2020-048423supp001.pdf]

## Appendix 1: Example search strategy: Pubmed/Medline

((("Critical Care"[Mesh] OR "critical care"[tw] OR "Critical Illness"[Mesh] OR "Critical Illness"[tw] OR "Critical Care Nursing"[Mesh] OR "Critical Care Outcomes"[Mesh] OR "intensive care"[tw] OR "Intensive Care Units"[Mesh] OR "intermediate care unit"[tw] OR "step down unit"[tw] OR "Shock"[Mesh] OR "Cardiac Arrest"[tw] OR "heart arrest"[MeSH] OR "Respiratory Arrest"[tw] OR "Emergency Medicine"[Mesh] OR "Evidence-Based Emergency Medicine"[Mesh] OR "Emergency Nursing"[Mesh] OR "Emergency Treatment"[mh:noexp] OR "Advanced Trauma Life Support Care"[mesh] OR "Resuscitation"[mesh] OR "cardiopulmonary resuscitation"[tw] OR "Cardiopulmonary Resuscitation"[mesh] OR "Heart Massage"[mesh] OR "Respiration, Artificial"[mesh] OR ventilator\*[ti] OR icu[ti] OR picu[ti] OR nicu[ti] OR ccu[ti] OR cpr[ti] OR "ambulances"[Mesh] OR "Emergency Service, Hospital"[mesh] OR "Poison Control Centers"[mesh] OR "Triage"[mh:noexp] OR "Hospital Rapid Response Team"[Mesh])) AND ((("Developing Countries"[Mesh] OR "Medically Underserved Area"[Mesh] OR "developing country"[tw] OR "developing countries"[tw] OR "developing nation"[tw] OR "developing nations"[tw] OR "developing population"[tw] OR "developing populations"[tw] OR "developing world"[tw] OR "less developed country"[tw] OR "less developed countries"[tw] OR "less developed nation"[tw] OR "less developed nations"[tw] OR "less developed population"[tw] OR "less developed populations"[tw] OR "less developed world"[tw] OR "lesser developed country"[tw] OR "lesser developed countries"[tw] OR "lesser developed nation"[tw] OR "lesser developed nations"[tw] OR "lesser developed population"[tw] OR "lesser developed populations"[tw] OR "lesser developed world"[tw] OR "under developed country"[tw] OR "under developed countries"[tw] OR "under developed nation"[tw] OR "under developed nations"[tw] OR "under developed population"[tw] OR "under developed populations"[tw] OR "under developed world"[tw] OR "underdeveloped country"[tw] OR "underdeveloped countries"[tw] OR "underdeveloped nation"[tw] OR "underdeveloped nations"[tw] OR "underdeveloped population"[tw] OR "underdeveloped populations"[tw] OR "underdeveloped world"[tw] OR "middle income country"[tw] OR "middle income countries"[tw] OR "middle income nation"[tw] OR "middle income nations"[tw] OR "middle income population"[tw] OR "middle income populations"[tw] OR "low income country"[tw] OR "low income countries"[tw] OR "low income nation"[tw] OR "low income nations"[tw] OR "low income population"[tw] OR "low income populations"[tw] OR "lower income country"[tw] OR "lower income countries"[tw] OR "lower income nation"[tw] OR "lower income nations"[tw] OR "lower income population"[tw] OR "lower income populations"[tw] OR "underserved country"[tw] OR "underserved countries"[tw] OR "underserved nation"[tw] OR "underserved nations"[tw] OR "underserved population"[tw] OR "underserved populations"[tw] OR "underserved world"[tw] OR "under served country"[tw] OR "under served countries"[tw] OR "under served nation"[tw] OR "under served nations"[tw] OR "under served population"[tw] OR "under served populations"[tw] OR "under served world"[tw] OR "deprived country"[tw] OR "deprived countries"[tw] OR "deprived nation"[tw] OR "deprived nations"[tw] OR "deprived population"[tw] OR "deprived populations"[tw] OR "deprived world"[tw] OR "poor country"[tw] OR "poor countries"[tw] OR "poor nation"[tw] OR "poor nations"[tw] OR "poor population"[tw] OR "poor populations"[tw] OR "poor world"[tw] OR "poorer country"[tw] OR "poorer countries"[tw] OR "poorer nation"[tw] OR "poorer nations"[tw] OR "poorer population"[tw] OR "poorer populations"[tw] OR "poorer world"[tw] OR "developing economy"[tw] OR "developing economies"[tw] OR "less developed economy"[tw] OR "less developed economies"[tw] OR "lesser developed economy"[tw] OR "lesser developed economies"[tw] OR "under developed economy"[tw] OR "under developed economies"[tw] OR "underdeveloped economy"[tw] OR "underdeveloped economies"[tw] OR "middle income economy"[tw] OR "middle income economies"[tw] OR "low income economy"[tw] OR "low income economies"[tw] OR "lower income economy"[tw] OR "lower income economies"[tw] OR "low gdp"[tw] OR "low gnp"[tw] OR "low gross domestic"[tw] OR "low gross national"[tw] OR "lower gdp"[tw] OR "lower gnp"[tw] OR "lower gross domestic"[tw] OR "lower gross national"[tw] OR lmic[tw] OR lmics[tw] OR "third world"[tw] OR "lami country"[tw] OR "lami countries"[tw] OR "transitional country"[tw] OR "transitional countries"[tw])) OR (Afghanistan[tw] OR "guatemala" [tw] OR "samoa" [tw] OR tonga OR "cape verde" [tw] OR Armenia [tw] OR Bangladesh[tw] OR Benin[tw] OR Bhutan[tw] OR Bolivia[tw] OR "Burkina Faso"[tw] OR Burundi[tw] OR "Cabo Verde"[tw] OR Cambodia[tw] OR Cameroon[tw] OR "Central African Republic"[tw] OR Chad[tw] OR Comoros[tw] OR Congo[tw] OR "Cote d'Ivoire"[tw] OR Djibouti[tw] OR Egypt[tw] OR "El Salvador"[tw] OR Eritrea[tw] OR Ethiopia[tw] OR Gambia[tw] OR Ghana[tw] OR Guinea[tw] OR "Guinea-Bissau"[tw] OR Haiti[tw] OR Honduras[tw] OR India[tw] OR Indonesia[tw] OR Kenya[tw] OR Kiribati[tw] OR "Democratic

People's Republic of Korea"[tw] OR "north korea"[tw] OR Kosovo[tw] OR Kyrgyzstan[tw] OR laos[tw] OR Lesotho[tw] OR Liberia[tw] OR Madagascar[tw] OR Malawi[tw] OR Mali[tw] OR Mauritania[tw] OR Micronesia[tw] OR Moldova[tw] OR Mongolia[tw] OR Morocco[tw] OR Mozambique[tw] OR Myanmar[tw] OR Nepal[tw] OR Nicaragua[tw] OR Niger[tw] OR Nigeria[tw] OR Pakistan[tw] OR "Papua New Guinea"[tw] OR Philippines[tw] OR Rwanda[tw] OR "Sao Tome"[tw] OR Principe[tw] OR Senegal[tw] OR "Sierra Leone"[tw] OR "Solomon Islands"[tw] OR Somalia[tw] OR "South Sudan"[tw] OR "Sri Lanka"[tw] OR Sudan[tw] OR Swaziland[tw] OR syria[tw] OR Tajikistan[tw] OR Tanzania[tw] OR "Timor-Leste"[tw] OR Togo[tw] OR Tunisia[tw] OR Uganda[tw] OR Ukraine[tw] OR Uzbekistan[tw] OR Vanuatu[tw] OR Vietnam[tw] OR "West Bank"[tw] OR Yemen[tw] OR Zambia[tw] OR Zimbabwe[tw] OR Kyrgyz[tw] OR Syrian[tw] OR "lao pdr"[tw] OR Burma[tw] OR gaza[tw] OR "ivory coast"[tw] OR Afghanistan[mesh] OR "guatemala" [mesh] OR "samoa" [mesh] OR tonga OR "cape verde" [mesh] OR Armenia [mesh] OR Bangladesh[mesh] OR Benin[mesh] OR Bhutan[mesh] OR Bolivia[mesh] OR "Burkina Faso"[mesh] OR Burundi[mesh] OR "Cabo Verde"[mesh] OR Cambodia[mesh] OR Cameroon[mesh] OR "Central African Republic"[mesh] OR Chad[mesh] OR Comoros[mesh] OR Congo[mesh] OR "Cote d'Ivoire"[mesh] OR Djibouti[mesh] OR Egypt[mesh] OR "El Salvador"[mesh] OR Eritrea[mesh] OR Ethiopia[mesh] OR Gambia[mesh] OR Ghana[mesh] OR Guinea[mesh] OR "Guinea-Bissau"[mesh] OR Haiti[mesh] OR Honduras[mesh] OR India[mesh] OR Indonesia[mesh] OR Kenya[mesh] OR Kiribati[mesh] OR "Democratic People's Republic of Korea"[mesh] OR Kosovo[mesh] OR Kyrgyzstan[mesh] OR laos[mesh] OR Lesotho[mesh] OR Liberia[mesh] OR Madagascar[mesh] OR Malawi[mesh] OR Mali[mesh] OR Mauritania[mesh] OR Micronesia[mesh] OR Moldova[mesh] OR Mongolia[mesh] OR Morocco[mesh] OR Mozambique[mesh] OR Myanmar[mesh] OR Nepal[mesh] OR Nicaragua[mesh] OR Niger[mesh] OR Nigeria[mesh] OR Pakistan[mesh] OR "Papua New Guinea"[mesh] OR Philippines[mesh] OR Rwanda[mesh] OR "Sao Tome and Principe"[mesh] OR Senegal[mesh] OR "Sierra Leone"[mesh] OR "melanesia"[mesh] OR Somalia[mesh] OR "South Sudan"[mesh] OR "Sri Lanka"[mesh] OR Sudan[mesh] OR Swaziland[mesh] OR syria[mesh] OR Tajikistan[mesh] OR Tanzania[mesh] OR "Timor-Leste"[mesh] OR Togo[mesh] OR Tunisia[mesh] OR Uganda[mesh] OR Ukraine[mesh] OR Uzbekistan[mesh] OR Vanuatu[mesh] OR Vietnam[mesh] OR Yemen[mesh] OR Zambia[mesh] OR Zimbabwe[mesh])) NOT ("Emergency Services, Psychiatric"[Mesh] OR "Addresses"[pt] OR "Autobiography"[pt] OR "Bibliography"[pt] OR "Biography"[pt] OR "Case Reports"[pt] OR "Comment"[pt] OR "Congresses"[pt] OR "Consensus Development Conference"[pt] OR "Consensus Development Conference, NIH"[pt] OR "Dictionary"[pt] OR "Directory"[pt] OR "Editorial"[pt] OR "Electronic Supplementary Materials"[pt] OR "Festschrift"[pt] OR "Historical Article"[pt] OR "Interactive Tutorial"[pt] OR "Interview"[pt] OR "Lectures"[pt] OR "Legal Cases"[pt] OR "Legislation"[pt] OR "Letter"[pt] OR "News"[pt] OR "Newspaper Article"[pt] OR "Overall"[pt] OR "Patient Education Handout"[pt] OR "Periodical Index"[pt] OR "Personal Narratives"[pt] OR "Portraits"[pt] OR "Practice Guideline"[pt] OR "Published Erratum"[pt] OR "Retracted Publication"[pt] OR "Retraction of Publication"[pt] OR "Technical Report"[pt] OR "Video-Audio Media"[pt] OR "Webcasts"[pt] OR "case report"[ti] OR bystand\*[ti])) AND english[lang] NOT ("animals"[mesh] NOT "humans"[mesh]) AND ("2008/01/01"[PDAT] : "3000/12/31"[PDAT])
